# Supplementary material for: Targeting Mitochondrial Complex I Overcomes Chemoresistance in High OXPHOS Pancreatic Cancer
Source: PubMed Central journal article supplement — Cell Rep Med. 2020 Nov 17;1(8):100143. doi: 10.1016/j.xcrm.2020.100143 (PMC7691450; doi:10.1016/j.xcrm.2020.100143), 2020-11-17
Supplement: mmc2.pdf [file mmc2.pdf]

# Targeting Mitochondrial Complex I Overcomes Chemoresistance in High OXPHOS Pancreatic Cancer

## Graphical Abstract

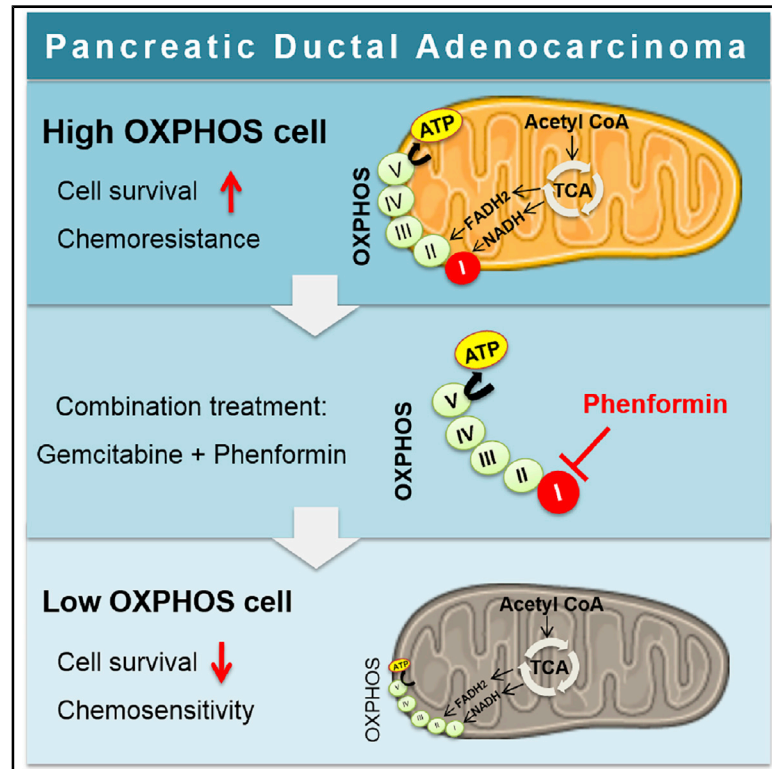

## Authors

Rawand Masoud,  
Gabriela Reyes-Castellanos,  
Sophie Lac, ..., Nelson Dusetti,  
Juan Iovanna, Alice Carrier

## Correspondence

masoud.rawand@gmail.com (R.M.),  
alice.carrier@inserm.fr (A.C.)

## In Brief

Masoud et al. reveal that pancreatic cancer patients can be stratified according to their mitochondrial oxidative phosphorylation (OXPHOS) activity and to the expression of mitochondrial respiratory complex I. Targeting mitochondrial respiration with the complex I inhibitor phenformin cooperates with gemcitabine to eradicate high OXPHOS pancreatic cancer cells.

## Highlights

- Pancreatic ductal adenocarcinoma (PDAC) displays OXPHOS heterogeneity
- High OXPHOS PDAC tumors are enriched in mitochondrial respiratory complex I
- Complex I inhibitor phenformin synergizes with chemotherapy in high OXPHOS cells
- Phenformin cooperates with gemcitabine antitumoral activity in high OXPHOS tumors

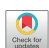

## Article

# Targeting Mitochondrial Complex I Overcomes Chemoresistance in High OXPPOS Pancreatic Cancer

Rawand Masoud,<sup>1,3,\*</sup> Gabriela Reyes-Castellanos,<sup>1,3</sup> Sophie Lac,<sup>1,4</sup> Julie Garcia,<sup>1</sup> Samir Dou,<sup>1</sup> Laetitia Shintu,<sup>2</sup> Nadine Abdel Hadi,<sup>1</sup> Tristan Gicquel,<sup>1</sup> Abdessamad El Kaoutari,<sup>1</sup> Binta Diémé,<sup>2,5</sup> Fabrice Tranchida,<sup>2</sup> Laurie Cormareche,<sup>1</sup> Laurence Borge,<sup>1</sup> Odile Gayet,<sup>1</sup> Eddy Pasquier,<sup>1</sup> Nelson Dusetti,<sup>1</sup> Juan Iovanna,<sup>1</sup> and Alice Carrier<sup>1,6,\*</sup>

<sup>1</sup>Aix Marseille Université, CNRS, INSERM, Institut Paoli-Calmettes, Centre de Recherche en Cancérologie de Marseille (CRCM), F-13009 Marseille, France

<sup>2</sup>Aix Marseille Université, CNRS, Centrale Marseille, ISM2, F-13013 Marseille, France

<sup>3</sup>These authors contributed equally

<sup>4</sup>Present address: Innate Pharma, F-13009 Marseille, France

<sup>5</sup>Present address: Institut de Chimie de Clermont-Ferrand, PlateForme d'Exploration du Métabolisme (PFEM), Université Clermont-Auvergne, F-63000 Clermont-Ferrand, France

<sup>6</sup>Lead Contact

\*Correspondence: [masoud.rawand@gmail.com](mailto:masoud.rawand@gmail.com) (R.M.), [alice.carrier@inserm.fr](mailto:alice.carrier@inserm.fr) (A.C.)  
<https://doi.org/10.1016/j.xcrm.2020.100143>

## SUMMARY

Mitochondrial respiration (oxidative phosphorylation, OXPPOS) is an emerging target in currently refractory cancers such as pancreatic ductal adenocarcinoma (PDAC). However, the variability of energetic metabolic adaptations between PDAC patients has not been assessed in functional investigations. In this work, we demonstrate that OXPPOS rates are highly heterogeneous between patient tumors, and that high OXPPOS tumors are enriched in mitochondrial respiratory complex I at protein and mRNA levels. Therefore, we treated PDAC cells with phenformin (complex I inhibitor) in combination with standard chemotherapy (gemcitabine), showing that this treatment is synergistic specifically in high OXPPOS cells. Furthermore, phenformin cooperates with gemcitabine in high OXPPOS tumors in two orthotopic mouse models (xenografts and syngeneic allografts). In conclusion, this work proposes a strategy to identify PDAC patients likely to respond to the targeting of mitochondrial energetic metabolism in combination with chemotherapy, and that phenformin should be clinically tested in appropriate PDAC patient subpopulations.

## INTRODUCTION

Pancreatic cancer is one of the deadliest human cancers, with a 5-year relative survival rate of 8%.<sup>1</sup> Pancreatic cancer is the fourth leading cause of death by cancer in the Western world and expected to become the second by 2030.<sup>2</sup> Pancreatic ductal adenocarcinoma (PDAC) is the most common form of pancreatic cancer. Because it lacks early symptoms, PDAC is often diagnosed at an advanced stage, when patients are no longer eligible for surgical resection, which is possible in <15% of the cases and increases the 5-year survival rate to only 20%. Chemotherapy and radiation only allow a marginal increase in survival.<sup>3</sup> Therefore, new strategies are urgently needed to develop effective treatment options. Recent progress has been made in our understanding of the physiopathology of PDAC, such as the characterization of its large genetic heterogeneity.<sup>4</sup> Targeted therapies have not yet had a real impact on this disease; in particular, targeting oncogenic Kras (mutated in most of PDAC) proved to be disappointing.<sup>5,6</sup>

Recent papers have demonstrated an extensive reprogramming of metabolism in PDAC, as is the case in all cancers, sup-

porting tumor progression and therapeutic resistance.<sup>7–9</sup> Active metabolism is essential for the generation of the energy and biochemical building blocks that are required for tumoral growth. It is now well known that the two pathways generating energy (ATP), glycolysis and mitochondrial respiration through oxidative phosphorylation (OXPPOS), coexist in cancer cells including PDAC.<sup>9–11</sup> The pro-survival role of mitochondria in pancreatic cancer stem cells or dormant cells has been reported,<sup>12,13</sup> and OXPPOS is an emerging target in cancer therapy.<sup>14–17</sup> The biguanides metformin and phenformin were reported to inhibit mitochondrial respiratory complex I.<sup>18–21</sup> In PDAC preclinical models, metformin and phenformin are both able to inhibit tumor growth,<sup>22,23</sup> and metformin treatment amplifies the gemcitabine-induced delay in tumor growth through a less reactive pancreatic microenvironment.<sup>24</sup> Treatment of diabetic patients with metformin was described to lower the risk to develop PDAC,<sup>25</sup> motivating clinical trials combining metformin with chemotherapy. However, supplementation with metformin so far has not been found to improve the outcome of PDAC patients treated with gemcitabine and erlotinib.<sup>26,27</sup> Drugging OXPPOS still suffers from a lack of knowledge of the tumor context in which OXPPOS

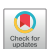

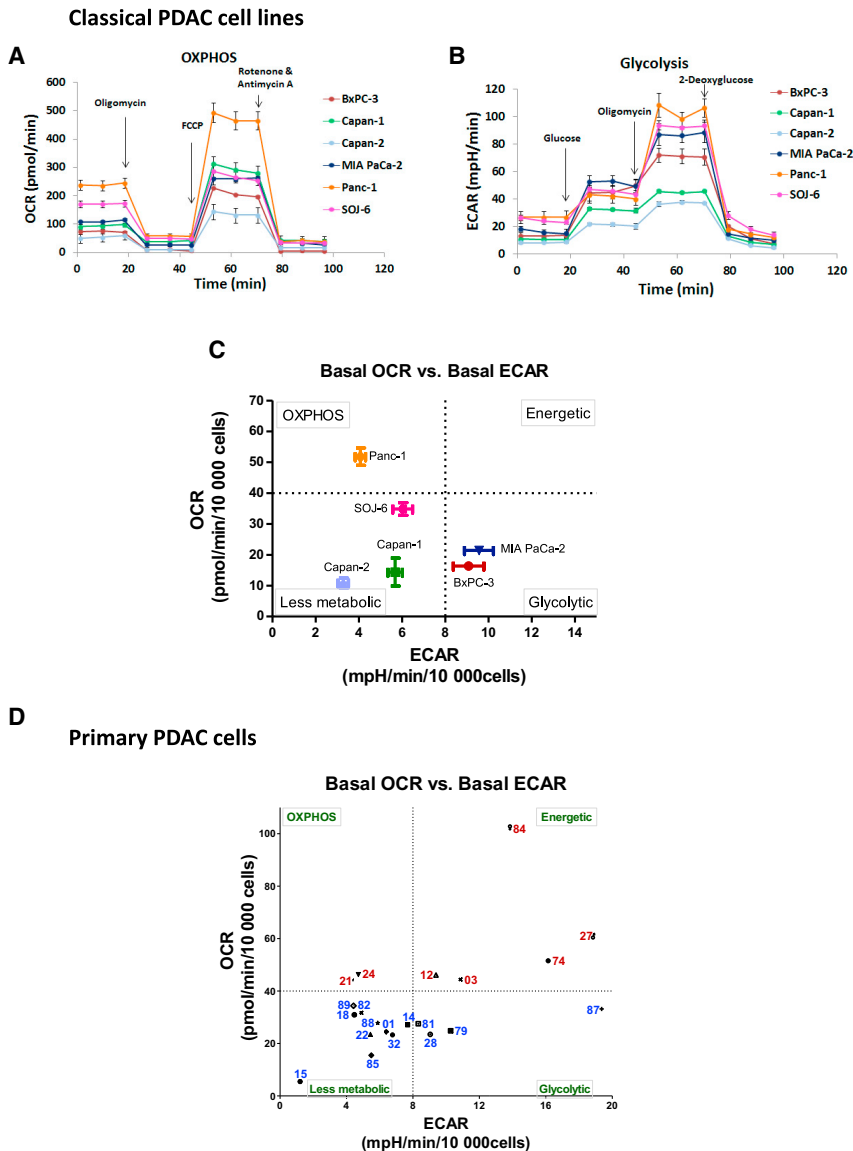

**Figure 1. Stratification of PDAC Tumors According to Their Energetic Metabolism**

(A) Oxygen consumption rate (OCR) was measured in the 6 classical PDAC cell lines under basal conditions and following the injection of oligomycin, carbonyl cyanide-p-trifluoromethoxyphenyl-hydrazone (FCCP), and rotenone + antimycin A. (B) Extracellular acidification rate (ECAR) was measured under basal conditions and following the addition of glucose, oligomycin, and 2-deoxyglucose.

(C) Basal OCR versus basal ECAR plot (both normalized to 10,000 seeded cells) shows the clustering of the 6 PDAC classical cell lines into 3 metabolic groups: Panc-1 is mostly respiratory (OXPHOS); MIA PaCa-2 and BxPC-3 are mostly glycolytic (glycolytic); and Capan-1, Capan-2, and to a lesser extent SOJ-6, have a relative lower energetic metabolism compared to the other cell lines (less metabolic group). The dotted lines indicate the thresholds that we selected between high and low OCR and ECAR.

(D) Basal OCR versus basal ECAR plot (both normalized to 10,000 seeded cells) shows the clustering of the 21 primary PDAC cancer cells derived from PDX into 4 different groups with respect to their basal energetic features. A fourth group with high rates of both OCR and ECAR was found. High OXPHOS patients are depicted with the red color, and low OXPHOS with blue color. The dotted lines indicate the thresholds that we selected between high and low OCR and ECAR. This plot is representative of at least 3 independent experiments for each patient. For clarity, a short version of the anonymized name of patients is used. Representative profiles of at least 3 independent experiments are shown in (A) and (B). See also Figures S1 and S2 and Table S1.

is a vulnerability. Although metabolite profiling stratification of PDAC was already reported,<sup>28</sup> functional investigation of energetic metabolism in a large cohort of PDAC patients is required. We report here that PDAC tumors are highly heterogeneous in terms of energetic metabolism, and that high OXPHOS is a biomarker for sensitivity to treatment with phenformin (more efficient than metformin) in combination with chemotherapy.

## RESULTS

### Energetic Metabolism Heterogeneity in PDAC

We used a Seahorse device to measure the cellular oxygen consumption rate (OCR) and extracellular acidification rate (ECAR) in PDAC cells, to determine mitochondrial respiration (OXPHOS) and glycolysis, respectively. We started this functional analysis with six classical PDAC cell lines, which showed different levels

of basal respiration, ATP production by mitochondria, and respiratory spare capacity, the Panc-1 cell line being the most efficient for mitochondrial respiration (Figures 1A and S1A). Furthermore, different levels of basal glycolysis and glycolytic reserve were observed between cell lines (Figures 1B and S1B). Thus, the cell lines can be classified into three different groups with respect to their basal energetic features (Figure 1C): Panc-1 is mostly respiratory (OXPHOS group); MIA PaCa-2 and BxPC-3 are mainly glycolytic (glycolytic group); and Capan-1, Capan-2, and to a lesser extent SOJ-6, have a relative lower energetic metabolism (less metabolic group). An alternative representation of the cell energetic preference is the ratio OXPHOS:glycolysis (Figure S1C). ATP production was shown to rely more on OXPHOS than glycolysis in all of the cells (Figure S1D). Importantly, the metabolic status of each cell line was found to be independent of its proliferation rate, as shown in Figure S2. Moreover, Seahorse analysis showed that all of the cell lines are plastic (i.e., able to shift to the other energetic pathway, if necessary) at various degrees, Capan-1 and Panc-1 being the most plastic to OXPHOS or glycolysis, respectively (Figures

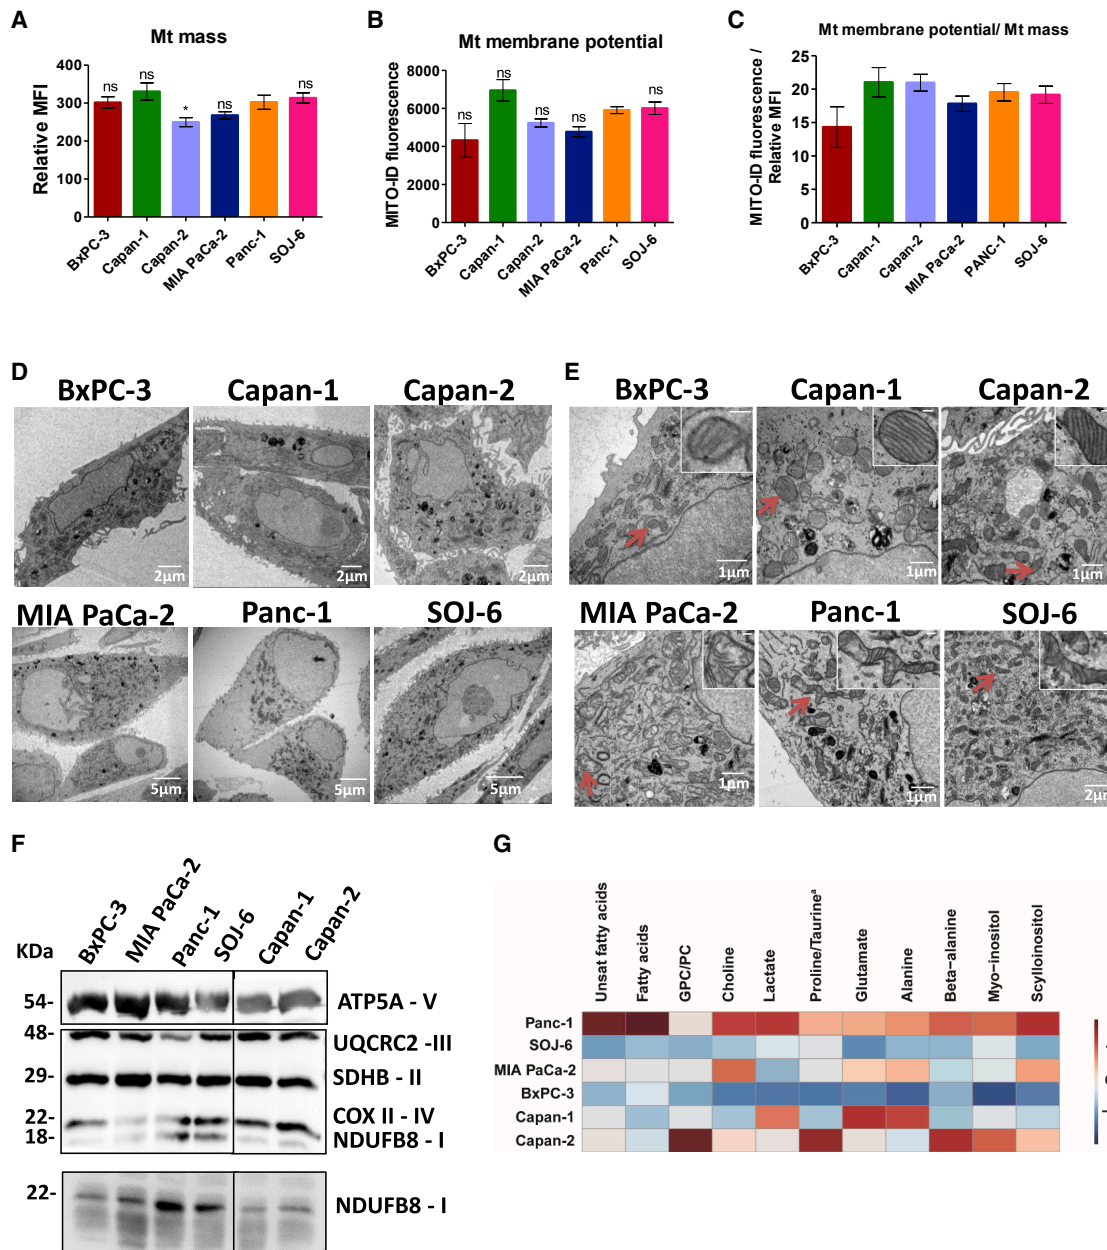

**Figure 2. Structure of Mitochondria and Abundance of Respiratory Complex I Reflect Respiration Activity**

(A and B) Flow cytometry analysis of the classical PDAC cells was carried out using (A) MitoTracker DeepRed for mitochondrial mass, and (B) MITO-ID for analysis of the mitochondrial membrane potential. Data are presented as the mean of triplicates  $\pm$  SEMs. Statistically significant differences between Panc-1 cell line with the 5 other cell lines: \* $p < 0.05$ , ns = not significant. Data are representative of 3 independent experiments.

(C) The ratio of mitochondrial membrane potential:mitochondrial mass was calculated from (A) and (B).

(D and E) Representative transmission electron microscopy images are shown at different magnifications. The scale is indicated in the lower right part of each image. High magnification is shown in the inset in (E).

(F) Top: Representative immunoblot showing the abundance of 5 mitochondrial proteins (ATP5A, UQCRC2, SDHB, COXII, and NDUFB8) belonging to respiratory chain complexes (V, III, II, IV, and I, respectively). Time exposure of the blot was 5 s for ATP5A while the rest was 1 min 30 s. Ponceau red staining was used as the control of equal protein loading (not shown). Bottom: Representative immunoblot showing the abundance of the protein NDUFB8 belonging to mitochondrial complex I. The time exposure was 1 min. Ponceau red staining was used as the control of equal protein loading (not shown). In both blots, an irrelevant lane was spliced out (vertical black line).

(G) Heatmap of differential metabolites between the 6 cell lines. Twelve metabolites were selected according to the results from the OPLS-DA differentiating OXPHOS Panc-1 cells from glycolytic MIA PaCa-2 and BxPC-3 cells ( $N = 21$ ; 1 predictive + 1 orthogonal OPLS-DA model with  $R^2_Y = 0.93$ ;  $QY = 0.87$ ;  $CV\_ANOVA$

(legend continued on next page)

S1E and S1F). Finally, using the Mito Fuel Flex Seahorse analysis, we addressed the dependency and flexibility of mitochondrial respiration toward the three main metabolic pathways feeding the tricarboxylic acid (TCA) cycle: glucose, glutamine, and fatty acids. Respiration was shown to depend on the glucose and glutamine pathways in all of the cell lines except Panc-1 (Figure S1G). Moreover, dependency for the fatty acid pathway was observed in all of the cell lines, including Panc-1, which is the least dependent. Regarding flexibility, the Panc-1 cell line was the only one to be highly flexible toward the three TCA cycle fuels. These data demonstrate that mitochondria are fully able to produce energy in all of the tested PDAC cell lines (at high level in Panc-1), and that all of the cell lines can increase mitochondrial respiration or shift to glycolysis, depending on their needs.

More important, we also analyzed OXPHOS and glycolysis in PDAC cells recently derived from patients enrolled in the Patient-Derived Xenografts (PDX) PaCaOmics program (described in the STAR Methods section). We tested 21 PDAC primary cells of this PDAC cohort using Seahorse. These cells are highly heterogeneous in terms of morphology and size; nevertheless, we were able to compare them by seeding an accurate number of cells to reach the maximum of 70%–80% of confluence in the bottom of the Seahorse plate wells (Table S1), then normalizing the values to 10,000 cells as done for the classical cell lines. This work led to the classification of these cells into four different groups with respect to their basal energetic features (Figure 1D): OXPHOS, glycolytic, less metabolic, and energetic (high OXPHOS and glycolysis). As observed for the PDAC classical cell lines, the metabolic status of the PDAC primary cells is unrelated to their proliferation rate (Figure S2). These data illustrate the high energetic heterogeneity between PDAC tumors, most of them showing a hybrid OXPHOS/glycolysis phenotype. Importantly, this work distinguishes PDAC tumors with a high OXPHOS rate.

### Enrichment of Mitochondrial Respiratory Chain Complex I in High OXPHOS PDAC

We then investigated the cellular and molecular mechanisms underlying the high respiratory rate in the high OXPHOS PDAC cells. Mitochondrial mass was monitored by MitoTracker staining followed by flow cytometry analysis in the classical PDAC cell lines (Figure 2A), showing no significant difference between them except a moderately weaker staining in Capan-2 cells. Accordingly, MitoTracker staining followed by fluorescence microscopy analysis did not show any obvious differences of mitochondrial network between cell lines (Figure S3A). Similarly, no difference in mitochondrial membrane potential was detected, and the ratio of mitochondrial membrane potential:mitochondrial mass was independent of the metabolic status (Figures 2B and 2C). Transmission electron microscopy (TEM) analysis was highly informative, showing the distribution of mitochondria in all of the cytoplasm, except for Panc-1, in which mitochondria are close to the nucleus (Figure 2D). Also, many figures of elongated mitochondria were observed in Panc-1 and SOJ-6 cells, contrary

to the other cell lines showing round mitochondria (Figure 2E). Cristae appeared normal in all of the cell lines except MIA PaCa-2, which showed unstructured cristae in many swollen mitochondria. These observations suggest good mitochondrial dynamics in Panc-1 and SOJ-6 cells, which could be the basis of their active mitochondrial respiration.

We then monitored the level of one protein of each of the five mitochondrial respiratory complexes by western blotting (WB) using an OXPHOS antibodies cocktail (Figures 2F and S3B). Interestingly, we found that complex I is more abundant in Panc-1 and SOJ-6 cells, which have the highest OXPHOS in comparison with all of the other cell lines. This was confirmed using the antibody alone specific to NDUF8 protein belonging to mitochondrial complex I (Figures 2F and S3B). Moreover, a metabolomics analysis was done by high-resolution magic angle spinning nuclear magnetic resonance (HRMAS-NMR), which is an approach amenable to implementation in the clinic (Figures 2G and S4A). The Panc-1 showed the highest level of metabolites, including those feeding the TCA cycle, such as fatty acids and amino acids. Intriguingly, Panc-1 cells also showed the highest level of the carnitine palmitoyltransferase 1A (CPT1A) protein involved in fatty acid metabolism in mitochondria (Figure S4B). These data, considered in parallel with Mito Fuel Flex Seahorse analysis (Figure S1G), suggest that high respiratory capacities of mitochondria in Panc-1 cells are supported by an active TCA cycle functioning independently of fuel origin. These data illustrate the metabolic specificities of Panc-1 cells, which seem to have a rich metabolic content, making their mitochondrial respiration highly independent and very flexible.

Afterward, we analyzed the RNA sequencing (RNA-seq) data obtained from the 21 primary PDAC cells of the PDX PaCaOmics cohort that we tested by Seahorse (see above). We performed a canonical partial least squares (PLS) analysis between the metabolic variables (OCR and ECAR from the Seahorse analysis) and gene expression. The sample projection on the two-dimensional (2D) space, which comprises the first two components, enables us to distinguish high and low OXPHOS groups in red and blue lettering, respectively (Figure 3A). Moreover, the gene set enrichment analysis (GSEA) on the gene loading values of the second component showed enrichment in mitochondrial electron transport at complex I and complex I assembly genes (normalized enrichment score [NES] = 2.03 and 2.01, respectively, adjusted p value = 3.7E–2), indicating a positive correlation between complex I and the OCR level (Figure 3B).

We also monitored the level of one protein of each of the five mitochondrial respiratory complexes by WB (Figure 3C), demonstrating that complex I specifically is significantly more abundant in high OXPHOS tumors than in low OXPHOS tumors. This was confirmed using anti-NDUF8 antibody alone (Figure 3D). Furthermore, transcriptomic data mining showed a highly significant enrichment in mitochondrial pathways in the 3 highest OXPHOS patients (27, 74, and 84) compared to 3 of the lowest OXPHOS patients (22, 32, and 85) (Table S2). In particular, 24

p value = 2.10–6). Data have been Pareto scaled. Each column is the autoscaled mean abundance (isolated NMR signal integration) of each metabolite ranging from dark blue (–1) to dark red (1). Unsat fatty acids, unsaturated fatty acids; GPC, glycerophosphocholine; PC, phosphocholine. Proline is the dominant metabolite in Panc-1, SOJ-6, BxPC-3, and MIA PaCa-2; taurine is the dominant metabolite in Capan-1 and Capan-2.

See also Figures S3 and S4.

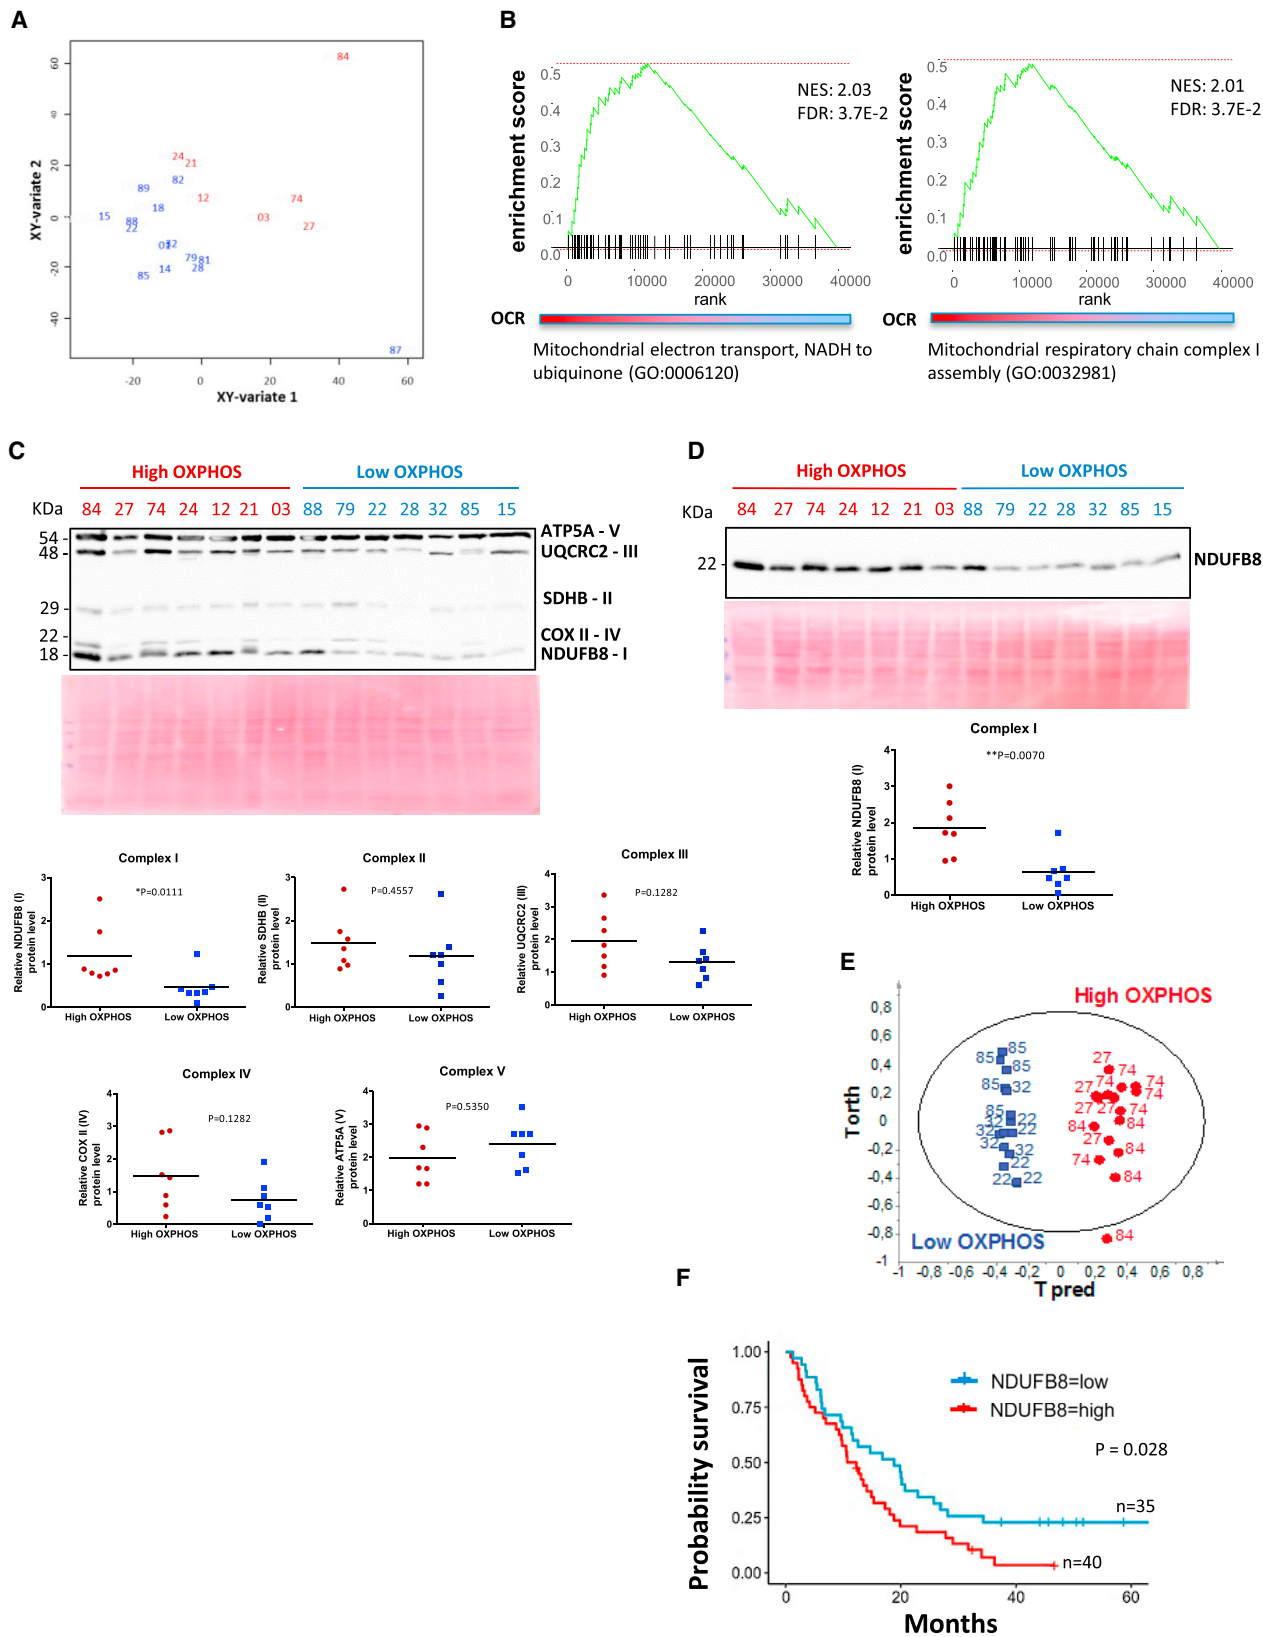

(legend on next page)

genes over 44 that encode proteins belonging to complex I<sup>29</sup> were found enriched in the high OXPPOS cells, including *NDUFB8* (Figure S5A; Table S2). Importantly, these 24 genes encode complex I protein subunits located in the 4 functional modules of the complex (Figure S5A).

Metabolomic analysis by HRMAS-NMR was done for these 3 high OXPPOS patients compared to the 3 low OXPPOS patients, confirming that they segregate into 2 different groups in the orthogonal PLS-discriminant analysis (OPLSDA) score plot (Figure 3E). Differential analysis highlighted the abundance of specific metabolites in each OXPPOS category: high OXPPOS cells were enriched in the metabolites choline (precursor of phosphocholine), phosphocholine (major lipid in membranes), glutamate (feeding the TCA cycle, and one of the 3 amino acids constituting glutathione), and glutathione (antioxidant), whereas low OXPPOS cells showed an accumulation of glucose (Figures S6A and S6B).

Finally, by examining the patient clinical data, we observed no link between the cell energetic preference and the histopathological differentiation, the basal and classical tumors classification,<sup>30</sup> or *Kras* and *p53* mutations (most of the tumors are mutated for both genes; Table S1). In contrast, we observed that the overall survival of high OXPPOS patients (functional analysis) was lower compared to low OXPPOS, even if the difference was not reaching statistical significance, probably because of the small number of patients (Figure S5B). To further address this point, we examined the expression of the gene encoding *NDUFB8* belonging to complex I that we quantified by western blotting (Figures 3C and 3D). For this purpose, we used RNA-seq data from the 75 PDX of the PaCaOmics cohort. RNA-seq data from xenografts instead of cells present the obvious advantage that tumor cells are in an environment closer to the context found in patients than in 2D cultures. Importantly, RNA-seq analysis can discriminate human tumor genes from murine stromal genes. Figure 3F shows with strong evidence ( $p = 0.028$ ) that patients with high *NDUFB8* expression have a lower survival rate than patients with low *NDUFB8* expression, independently whether or not the patients were resected (Figure S5C).

These data show a correlation between mitochondrial respiratory genes expression and high OXPPOS status in PDAC, strongly suggesting that the transcriptomic analysis is a potential tool to identify high OXPPOS patients in the clinic. Moreover,

these data point to mitochondrial respiratory complex I as a vulnerability of high OXPPOS PDAC.

### Synergy of Phenformin with Gemcitabine in High OXPPOS PDAC *In Vitro*

We observed different sensitivities of the six classical PDAC cell lines to gemcitabine *in vitro*, with the Panc-1 cell line being the least sensitive (Figure 4A). We wondered whether treating cells with a drug inhibiting mitochondrial respiratory complex I could counter the resistance to gemcitabine in the high OXPPOS Panc-1 cell line. We first treated cells with phenformin, metformin, and rotenone, which are known to target complex I. Dose-response curves show that these three drugs are able to decrease pancreatic cancer cell viability, and that phenformin is more efficient than metformin (Figures 4B, S7A, and S7B). More important, we showed that combining phenformin at 0.5 mM (greater than the half-maximal inhibitory concentration [IC<sub>50</sub>] of the Panc-1 line, which is the least sensitive; Figure 4B) with increasing doses of gemcitabine specifically sensitizes Panc-1 cells (Figures 4C and S7C). Combination indexes lower than 0.5 for low gemcitabine concentrations show a strong synergy between phenformin and gemcitabine specifically in the high OXPPOS Panc-1 cells (Figure S7D).

We then addressed the possibility that combining gemcitabine with phenformin could also be synergistic in primary high OXPPOS PDAC cells. For this purpose, we performed chemograms with the same 6 patients than for the transcriptomic data mining and metabolomic analyses (shown above): 3 high OXPPOS patients (27, 74, and 84) compared to 3 low OXPPOS patients (22, 32, and 85). We treated the cells with phenformin, showing its ability to decrease cell viability for the 6 tested patients irrespective of their OXPPOS status (Figure S8A). More important, our data shown in Figures 4D and S8B demonstrate that combining phenformin at 0.5 mM with increasing doses of gemcitabine specifically sensitizes high OXPPOS cells to gemcitabine, with combination indexes lower than 0.5, indicating a strong synergy (Figure S8C). These data show that targeting complex I with phenformin in the high OXPPOS PDAC cells potentiates their sensitivity to gemcitabine.

The importance of the OXPPOS status in the gemcitabine response was also assessed by OXPPOS shift assays (Figure 5).

### Figure 3. Correlation between the High OXPPOS Status and the Abundance of Mitochondrial Complex I, Both at mRNA and Protein Level in the Primary PDAC Cancer Cells

High OXPPOS patients are depicted in red, and low OXPPOS are in blue.

(A) Canonical correlation analysis: graphical representation of PDX using the averaged components 1 and 2 of transcriptomic and metabolic datasets that were retrieved from canonical PLS.

(B) Gene set enrichment analysis: the two plots show the enrichment score for the related mitochondrial pathway on the second canonical PLS component in (A).

(C) Representative immunoblot showing the abundance of the 5 mitochondrial proteins (ATP5A, UQCRC2, SDHB, COXII, and *NDUFB8*) belonging to mitochondrial complexes (V, III, II, IV, and I, respectively). Time exposure of the blot was 1 min. Ponceau red staining was used as the control of equal protein loading. Mitochondrial complexes protein levels were quantified from western blotting (WB) by ImageJ and normalized to Ponceau red staining. p value from Mann-Whitney test.

(D) Representative immunoblot showing the abundance of the mitochondrial protein *NDUFB8* belonging to mitochondrial complex I. Time exposure of the blot was 1 min. Complex I protein was quantified by ImageJ and normalized to Ponceau red staining used as control of equal protein loading. p value from Mann-Whitney test.

(E) Metabolic analysis by HRMAS-NMR for 6 primary PDAC cancer cells derived from PDX, 3 high OXPPOS (27, 74, and 84) and 3 low OXPPOS (22, 32, and 85). OPLSDA score plot showing the discrimination between high OXPPOS and low OXPPOS.

(F) Kaplan-Meier survival curve using transcriptomic analysis on patient-derived xenografts, divided into high and low *NDUFB8* gene expression groups ( $n = 40$  and  $n = 35$ , respectively; the cutpoint was 13.22). p value was calculated by the log-rank test.

See also Figures S5 and S6 and Table S2.

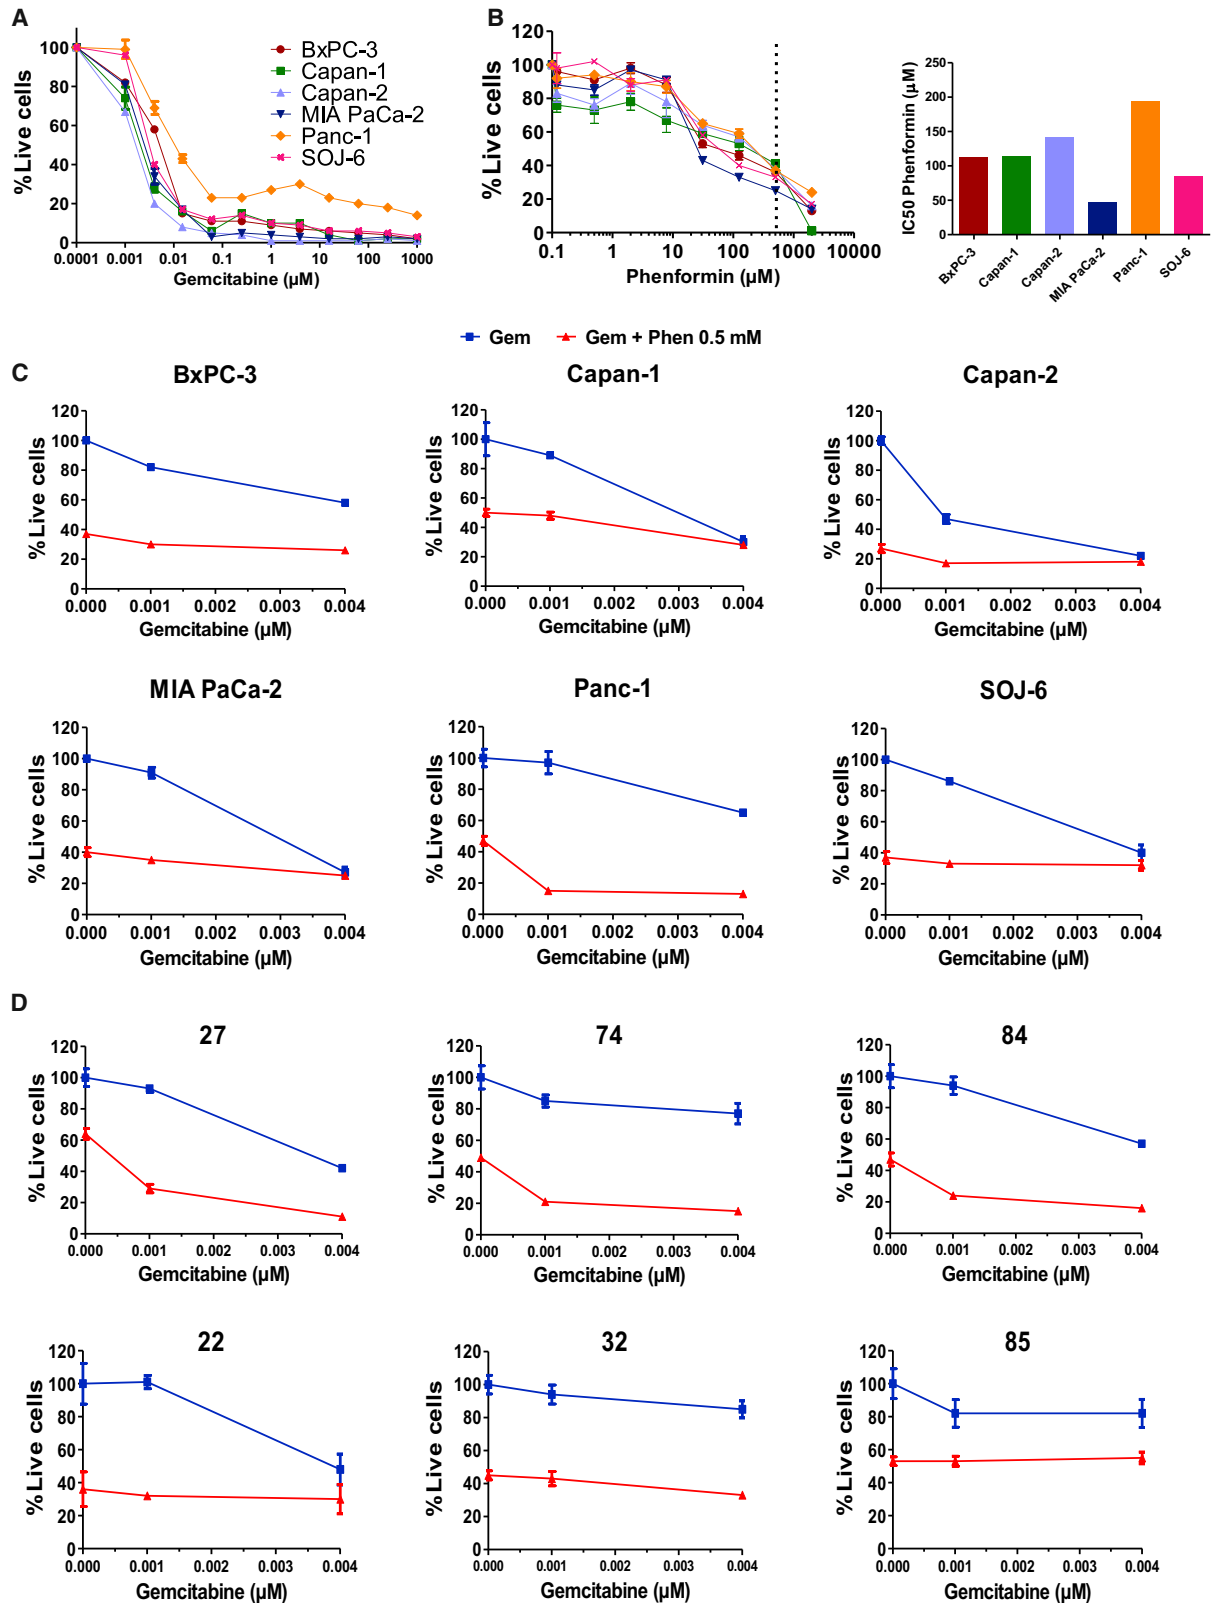

(legend on next page)



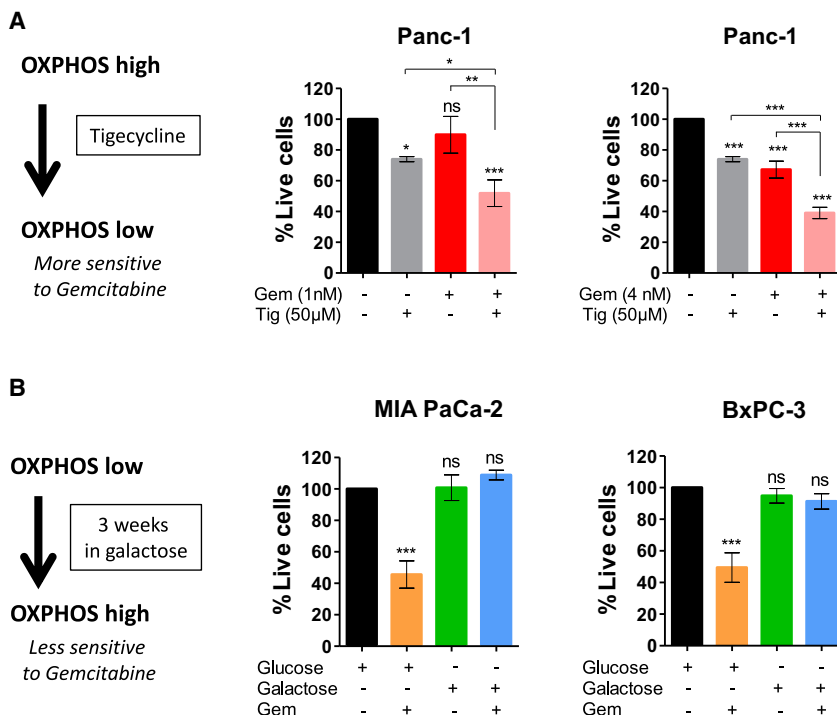

**Figure 5. OXPPOS Shift Experiments Demonstrating That Gemcitabine Sensitivity Is a Feature of OXPPOS Low Cells**

(A) Panc-1 cells shift from high OXPPOS to low OXPPOS by treatment with tigecycline (Tig) enhances gemcitabine (Gem) cytotoxicity efficacy. Cell viability was monitored after 72 h of treatment with or without Gem (Left: 1 nM; right: 4 nM) and Tig (50 μM). Live cells are indicated as a percentage of the control (vehicle treated). Data are means of triplicates ± SEMs (\*p < 0.05, \*\*p < 0.01, and \*\*\*, p < 0.001; symbol over the bar, versus non-treated control; ns, not significant). Data are representative of 3 independent experiments.

(B) MIA PaCa-2 and BxPC-3 cells shift from low OXPPOS to high OXPPOS by culture in galactose instead of glucose induces Gem resistance. Cell viability was monitored after 72 h of treatment with Gem (4 nM). Live cells are indicated as a percentage of the control (vehicle treated). Data are means of triplicates ± SEMs (\*\*p < 0.01 and \*\*\*p < 0.001 versus non-treated). Data are representative of 3 independent experiments.

Pharmacologic manipulation of high OXPPOS cell Panc-1 toward a low OXPPOS phenotype by inhibiting mitochondrial protein synthesis with tigecycline<sup>15</sup> was shown to increase cell sensitivity to gemcitabine (Figure 5A). Conversely, culturing low OXPPOS cells (MIA PaCa-2 and BxPC-3) in a medium containing galactose instead of glucose as the sole sugar source, which shifts the energetic metabolism from glycolysis to mitochondrial OXPPOS,<sup>15</sup> induced resistance to low concentrations of gemcitabine (Figure 5B). Thus, manipulating the mitochondrial energetic status toward low OXPPOS or high OXPPOS confers sensitivity or resistance to gemcitabine, respectively, confirming the potential of inhibiting OXPPOS in combination with gemcitabine to sensitize PDAC cells to chemotherapy.

#### Effect of Phenformin/Gemcitabine Combination in High OXPPOS PDAC *In Vivo*

We further assessed the synergistic impact of phenformin with gemcitabine in high OXPPOS PDAC *in vivo* in two different ortho-

topic mouse models: xenografts (Figures 6A–6C) and syngeneic allografts (Figures 6D and 6E).

For xenografts, Panc-1 and MIA PaCa-2 cells were implanted into the pancreas of immunodeficient mice, and treatments were administered using either a combination of phenformin and gemcitabine, or each drug alone. As expected, phenformin markedly increased the antitumoral effect of gemcitabine in the high OXPPOS Panc-1 xenografts, whereas no impact of phenformin on gemcitabine antitumoral activity was observed in the low OXPPOS MIA PaCa-2 xenografts (Figures 6B and 6C).

For the syngeneic allografts, we used KPC luc2 cells, which showed high OXPPOS status and moderate plasticity by Seahorse analysis (Figure S9A). In this immunocompetent context as well, the combination of the two drugs was more potent than gemcitabine alone to induce tumor regression (Figures 6E and S9B). These preclinical data demonstrate that targeting complex I with phenformin in high OXPPOS PDAC enhances the anticancer effect of gemcitabine, independently of the host immune system.

**Figure 4. Targeting Mitochondrial Respiratory Complex I with Phenformin Synergizes with Gemcitabine Antitumoral Activity in High OXPPOS Cells**

(A and B) Dose-response curves for the 6 classical PDAC cell lines treated with different concentrations of gemcitabine (A) or phenformin (B) for 72 h. Live cells are indicated as a percentage of the control (vehicle treated). Data are means of triplicates ± SEMs. Data are representative of 3 independent experiments. The 0.5 mM concentration of phenformin is highlighted by a vertical dotted line in (B). The IC<sub>50</sub> of phenformin was calculated and is shown on the right of the dose-response curve.

(C) Representative dose-response curves for the 6 PDAC cell lines treated with low concentrations of gemcitabine alone (blue curves) and gemcitabine in combination with 0.5 mM phenformin (red curves) for 72 h. Cell viability is indicated as a percentage of the control (vehicle treated). Data are means of triplicates ± SEMs.

(D) Representative dose-response curves for 6 primary PDAC cancer cells derived from PDX, 3 high OXPPOS (27, 74, and 84) and 3 low OXPPOS (22, 32, and 85). Cells were treated for 72 h with low concentrations of gemcitabine alone (blue curves) and in combination with 0.5 mM phenformin (red curves). Cell viability is indicated as the percentage of the control (vehicle treated). Data are means of triplicates ± SEMs.

See also Figures S7 and S8.

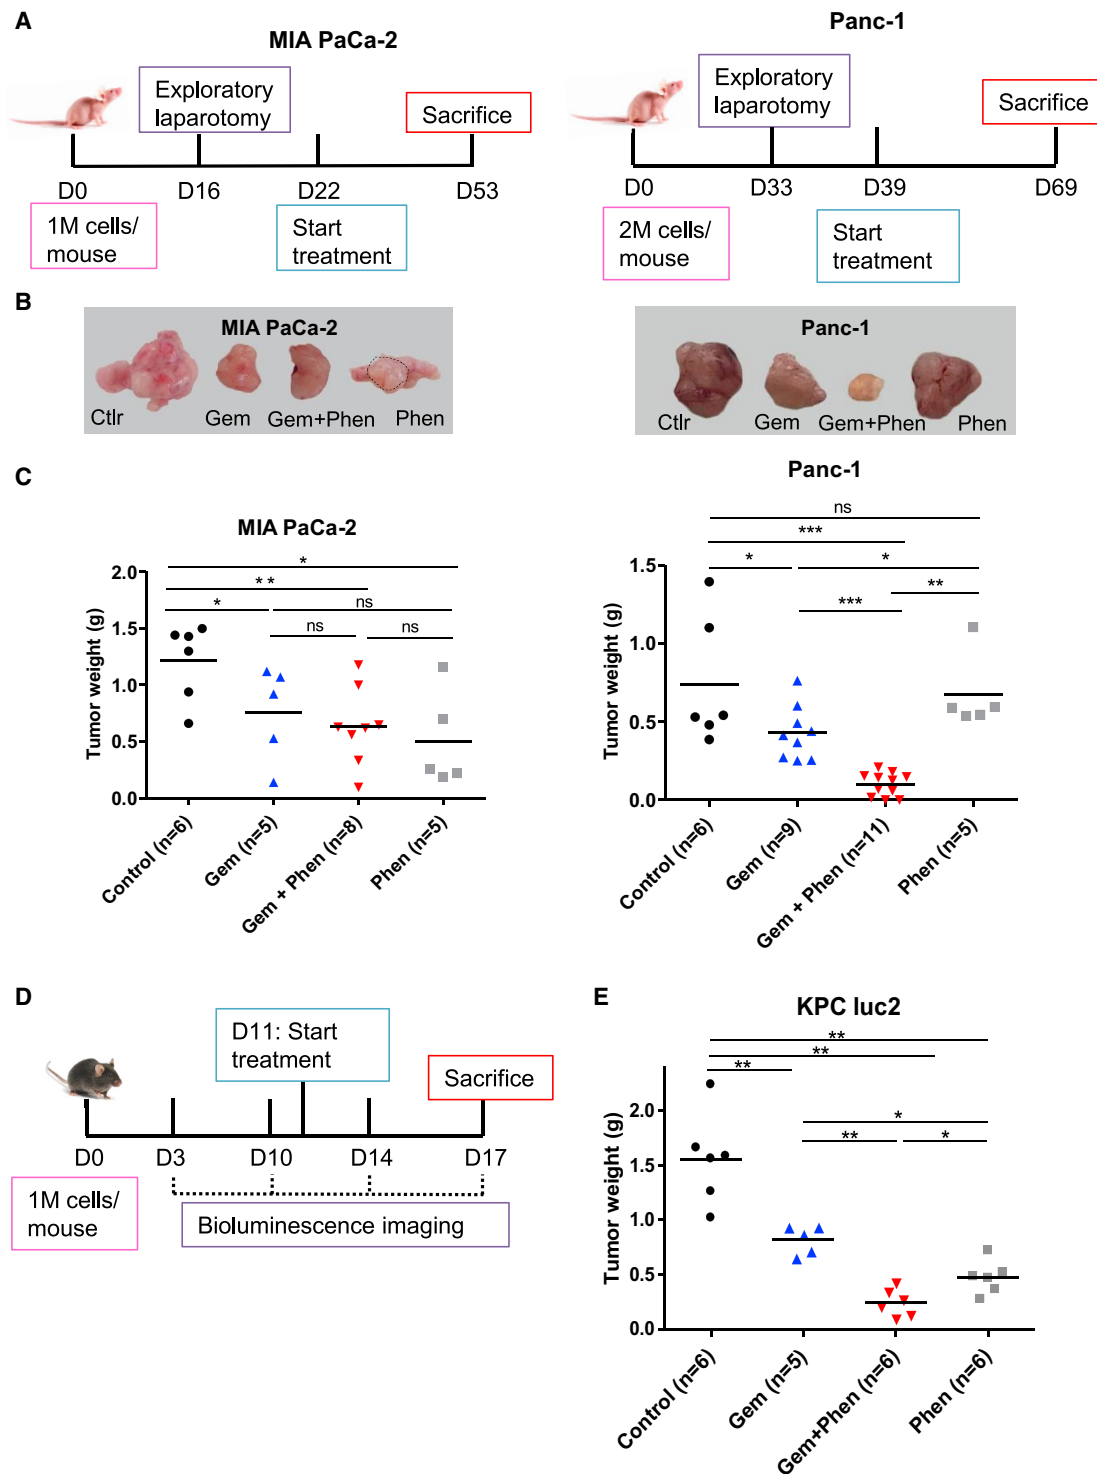

**Figure 6. Targeting Mitochondrial Respiratory Complex I with Phenformin Enhances Gemcitabine Antitumoral Activity in High OXPHOS Tumors in 2 Preclinical Mouse Models**

(A–C) Orthotopic xenografts.

(A) Experimental schematic representation. One or two million MIA PaCa-2 and Panc-1 cells, respectively, were surgically implanted into the pancreas of 6-week-old female Swiss nude mice. The presence of a pancreatic tumor was confirmed by exploratory laparotomy at day 16 (MIA PaCa-2) or day 33 (Panc-1). After surgery recovery, treatments were started and lasted 4 weeks.

(B) Representative gross photographs of pancreatic tumors for each treatment category.

(legend continued on next page)

## DISCUSSION

This study shows clearly that PDAC tumors can be functionally stratified according to their energetic metabolism, pointing to tumors with high OXPHOS activity. Concerning classical PDAC cell lines, our data are consistent with other reports, showing high OCR in Panc-1 and high glycolytic activity in BxPC-3 and MIA PaCa-2 cells.<sup>28,31</sup> Furthermore, our study shows that PDAC cells are highly plastic for energy production, as they can shift to OXPHOS or glycolysis when necessary, and that they can use any fuel to feed the TCA cycle. The most frequently mutated genes in PDAC are *Kras* and *TP53*, both known to play a role in metabolism.<sup>32–35</sup> We show that the OXPHOS status in PDAC cells is independent of the main genetic alterations. Therefore, we propose that mitochondrial metabolism could be targeted in therapy independently of the “Kras addiction.”

Moreover, our study provides insight into the cellular and molecular mechanisms underlying active mitochondrial respiration in PDAC cells. We show that high OXPHOS status is correlated with the abundance of metabolites fueling the TCA cycle, and elongated morphology of mitochondria, consistent with the importance of mitochondrial quality with a healthy metabolic machinery.<sup>36</sup>

Of foremost importance, we demonstrate a correlation between high OXPHOS status and the abundance of mitochondrial complex I, both at the protein level (WB) and mRNA level (transcriptomic analysis showing the gene enrichment of 24 complex I subunits). Of great relevance is that we found lower overall survival of high OXPHOS patients compared to low OXPHOS patients, both functionally and according to *NDUFB8* expression, the latter reaching statistical significance due to the high number of PDX (75). Importantly, this observation is independent whether or not the patients were resected (in our PaCaOmics cohort as in others, resected patients have a better prognosis than non-resected patients). This suggests an association between high OXPHOS status and poor prognosis of PDAC patients.

Furthermore, we demonstrate a synergy between standard chemotherapy (gemcitabine) and phenformin (targeting mitochondrial complex I) in high OXPHOS PDAC cells, regardless of whether they are long-standing established cell lines or recently established primary cells from PDX. Targeting mitochondria with phenformin induces an energetic shift toward low OXPHOS status,<sup>15</sup> which markedly enhances gemcitabine’s antitumoral effect.

The cooperation between phenformin and gemcitabine in high OXPHOS PDAC cells was also demonstrated *in vivo*. Here, we show that phenformin noticeably enhances the antitumoral effect of gemcitabine in high OXPHOS PDAC tumors, in two

different preclinical assays. One mode of action of the combination therapy could be that highly active mitochondrial respiration better sustains resistance to stress induced by the chemotherapeutic agent (DNA synthesis inhibition by gemcitabine), this pro-survival process being reduced by OXPHOS inhibition.

In this study, we used phenformin instead of metformin because of its higher efficiency on PDAC cells *in vitro*. This could result from the fact that metformin relies on members of the organic cation transporter (OCT) family for entering into cells, contrary to phenformin, which is readily transported into them. This capacity suggests that lower plasmatic concentrations of phenformin than metformin are clinically needed to successfully induce effect on the tumors (and our *in vivo* data are in favor of phenformin influence in tumors). Although phenformin was withdrawn from the US market because of its predisposition to induce lactic acidosis in diabetic patients, this side effect may be manageable with proper clinical vigilance. The cooperative action of phenformin on gemcitabine antitumoral activity observed specifically in high OXPHOS tumors, which we demonstrated *in vitro* and *in vivo*, suggests that phenformin should be clinically tested as an anticancer agent for the treatment of PDAC with an appropriate patient selection (high OXPHOS).

In conclusion, our study reveals a strong correlation between functional (Seahorse experiments) and molecular (RNA and protein) OXPHOS levels. This strong association opens the possibility of stratifying patients in the clinic according to mitochondrial respiration gene expression, and to identify the patients most likely to respond to mitochondrial respiration targeting in combination with standard chemotherapy.

## Limitations of Study

This study involves both the demonstration of OXPHOS functional and molecular stratification of PDAC patients and the proposal of drug combination for some of them endowed with high OXPHOS activity. The first limitation is that the method to stratify the patients in the clinic still needs to be developed further. The second limitation is that the mechanism of the cooperative action of phenformin on gemcitabine antitumoral activity, specifically in high OXPHOS tumors, must be investigated further. It is reported that the inhibition of mitochondrial activity induces an energy crisis and apoptosis in cancer cells, including PDAC. We therefore suggest that phenformin-driven inhibition of mitochondrial activity in the high OXPHOS PDAC cells induces a shift toward a low OXPHOS status, with the consequence of an energetic stress, which enhances the antitumoral activity of gemcitabine. Nevertheless, we cannot exclude other hypotheses, such as the possibility that phenformin could modify the metabolism of gemcitabine (entry into the cells, conversion into active metabolites).

(C) Weight of orthotopic xenografts. Vehicle (control, n = 6); gemcitabine alone (Gem, n = 5 for MIA-PaCa-2 and n = 9 for Panc-1); combo gemcitabine + phenformin (Gem + Phen, n = 8 for MIA-PaCa-2 and n = 11 for Panc-1); and phenformin alone (Phen, n = 5). The mean in each group is shown as a horizontal line. p values were calculated from the Mann-Whitney test. \*p < 0.05, \*\*p < 0.01, and \*\*\*p < 0.001.

(D and E) Orthotopic syngeneic allografts.

(D) Experimental scheme. One million KPC luc2 cells were intraperitoneally injected into 6-week-old female C57BL/6 mice. The presence of a pancreatic tumor was confirmed by bioluminescence (day 10), and the treatments were started at day 11 for 6 days.

(E) Weight of orthotopic allografts. Vehicle (control, n = 6); gemcitabine alone (Gem, n = 5); combo gemcitabine + phenformin (Gem + Phen, n = 6); and phenformin alone (Phen, n = 6). The mean in each group is shown as a horizontal line. p values were calculated from the Mann-Whitney test. \*p < 0.05 and \*\*p < 0.01.

See also [Figure S9](#).

Finally, it is important to mention that the therapeutic efficacy of the proposed combination treatment (phenformin and gemcitabine) has not yet been tested clinically.

## STAR★METHODS

Detailed methods are provided in the online version of this paper and include the following:

- **KEY RESOURCES TABLE**
- **RESOURCE AVAILABILITY**
  - Lead Contact
  - Materials Availability
  - Data and Code Availability
- **EXPERIMENTAL MODEL AND SUBJECT DETAILS**
  - Pancreatic Ductal Adenocarcinoma (PDAC) Cell Lines
  - Xenografts and allografts mouse models
  - PaCaOmics patient's cohort
- **METHOD DETAILS**
  - Real-time metabolic analysis
  - XF Cell Mito Stress Test (OXPHOS experiment)
  - XF Glycolysis Stress Test (Glycolysis experiment)
  - XF Mito Fuel Flex Test
  - Flow cytometry
  - Fluorescence microscopy
  - Transmission Electron Microscopy (TEM)
  - Immunoblotting
  - <sup>1</sup>H High Resolution Magic Angle Spinning-Nuclear Magnetic Resonance (HRMAS NMR) spectroscopy
  - Canonical correlation analysis
  - Differential gene expression analysis
  - Chemograms
  - OXPHOS shift assays
  - *In vivo* experiments
- **QUANTIFICATION AND STATISTICAL ANALYSIS**

## SUPPLEMENTAL INFORMATION

Supplemental Information can be found online at <https://doi.org/10.1016/j.xcrm.2020.100143>.

## ACKNOWLEDGMENTS

We thank Eric Mas (CRCM) for the SOJ-6 cells, Nathalie Auphan-Anezin (CIML) for the KPC luc2 cells, the cell culture platform (PCC, TPR2, Marseille, France) for technical assistance, Karim Sari and Régis Vitestelle for assistance with the use of the PSEA animal housing facility, Jérémy Nigri and Victoire Gouirand for advice on the orthotopic xenografts experiments, Jean-Emmanuel Sarry for helpful discussion, and Valérie Depraetere-Ferrier for editing the manuscript. We are grateful to members of the PICSL-FBI core facility (IBDM, AMU-Marseille) belonging to the France-Biolmaging national research infrastructure for the electron microscopy experiments. This work was supported by Institut National de la Santé et de la Recherche Médicale, Centre National de la Recherche Scientifique, Institut National Du Cancer (INCa), Fondation ARC pour la Recherche sur le Cancer (PJA 20151203544), La Ligue Nationale contre le Cancer (LNCC), DGOS (labelization SIRIC), Fondation Amidex, and Fondation de France. This work also benefited from grants from Cancéropôle Provence-Alpes-Côte d'Azur (PACA) and Fédération GEFLUC for the acquisition of the Seahorse XFe24 device. R.M. was supported by the Fondation ARC pour la Recherche sur le Cancer, S.L. and J.G. were supported by the Fondation pour la Recherche Médicale, G.R.-C. was supported by CONACYT

(Mexico, grant 339091/471717), S.D. was funded by IMODI, N.A.H. was funded by Association Azm et Saadé, T.G. was supported by the French Agence Nationale de la Recherche, and B.D. was funded by Cancéropôle PACA.

## AUTHOR CONTRIBUTIONS

Conceptualization and Methodology, R.M., S.L., and A.C.; Investigation, R.M., S.L., G.R.-C., J.G., L.S., N.A.H., T.G., B.D., F.T., L.C., and L.B.; Formal Analysis, R.M., S.L., G.R.-C., J.G., S.D., L.S., N.A.H., A.E.K., E.P., and A.C.; Resources, O.G., N.D., and J.I.; Writing – Original Draft, R.M., G.R.-C., and A.C.; Writing – Review & Editing, R.M., G.R.-C., and A.C.; Visualization, R.M., G.R.-C., and A.C.; Supervision, A.C.; Project Administration and Funding Acquisition, A.C.

## DECLARATION OF INTERESTS

The authors declare no competing interests.

Received: December 1, 2019

Revised: August 28, 2020

Accepted: October 22, 2020

Published: November 17, 2020

## REFERENCES

1. Siegel, R.L., Miller, K.D., and Jemal, A. (2018). Cancer statistics, 2018. *CA Cancer J. Clin.* 68, 7–30.
2. Rahib, L., Smith, B.D., Aizenberg, R., Rosenzweig, A.B., Fleshman, J.M., and Matrisian, L.M. (2014). Projecting cancer incidence and deaths to 2030: the unexpected burden of thyroid, liver, and pancreas cancers in the United States. *Cancer Res.* 74, 2913–2921.
3. Saluja, A.K., Dudeja, V., and Banerjee, S. (2016). Evolution of novel therapeutic options for pancreatic cancer. *Curr. Opin. Gastroenterol.* 32, 401–407.
4. Bailey, P., Chang, D.K., Nones, K., Johns, A.L., Patch, A.M., Gingras, M.C., Miller, D.K., Christ, A.N., Bruxner, T.J., Quinn, M.C., et al.; Australian Pancreatic Cancer Genome Initiative (2016). Genomic analyses identify molecular subtypes of pancreatic cancer. *Nature* 531, 47–52.
5. Eser, S., Schnieke, A., Schneider, G., and Saur, D. (2014). Oncogenic KRAS signalling in pancreatic cancer. *Br. J. Cancer* 111, 817–822.
6. Drosten, M., and Barbacid, M. (2020). Targeting the MAPK Pathway in KRAS-Driven Tumors. *Cancer Cell* 37, 543–550.
7. Biancur, D.E., and Kimmelman, A.C. (2018). The plasticity of pancreatic cancer metabolism in tumor progression and therapeutic resistance. *Biochim. Biophys. Acta Rev. Cancer* 1870, 67–75.
8. Halbrook, C.J., and Lyssiotis, C.A. (2017). Employing Metabolism to Improve the Diagnosis and Treatment of Pancreatic Cancer. *Cancer Cell* 31, 5–19.
9. Vaziri-Gohar, A., Zarei, M., Brody, J.R., and Winter, J.M. (2018). Metabolic Dependencies in Pancreatic Cancer. *Front. Oncol.* 8, 617.
10. Jia, D., Park, J.H., Jung, K.H., Levine, H., and Kaiparettu, B.A. (2018). Elucidating the Metabolic Plasticity of Cancer: Mitochondrial Reprogramming and Hybrid Metabolic States. *Cells* 7, 21.
11. Kim, J., and DeBerardinis, R.J. (2019). Mechanisms and Implications of Metabolic Heterogeneity in Cancer. *Cell Metab.* 30, 434–446.
12. Sancho, P., Burgos-Ramos, E., Tavera, A., Bou Kheir, T., Jagust, P., Schoenhals, M., Barneda, D., Sellers, K., Campos-Olivas, R., Graña, O., et al. (2015). MYC/PGC-1 $\alpha$  Balance Determines the Metabolic Phenotype and Plasticity of Pancreatic Cancer Stem Cells. *Cell Metab.* 22, 590–605.
13. Viale, A., Pettazzoni, P., Lyssiotis, C.A., Ying, H., Sánchez, N., Marchesini, M., Carugo, A., Green, T., Seth, S., Giuliani, V., et al. (2014). Oncogene ablation-resistant pancreatic cancer cells depend on mitochondrial function. *Nature* 514, 628–632.

14. Ashton, T.M., McKenna, W.G., Kunz-Schughart, L.A., and Higgins, G.S. (2018). Oxidative Phosphorylation as an Emerging Target in Cancer Therapy. *Clin. Cancer Res.* *24*, 2482–2490.
15. Farge, T., Saland, E., de Toni, F., Aroua, N., Hosseini, M., Perry, R., Bosc, C., Sugita, M., Stuani, L., Fraise, M., et al. (2017). Chemotherapy-Resistant Human Acute Myeloid Leukemia Cells Are Not Enriched for Leukemic Stem Cells but Require Oxidative Metabolism. *Cancer Discov.* *7*, 716–735.
16. Gentric, G., Kieffer, Y., Mieulet, V., Goundiam, O., Bonneau, C., Nemati, F., Hurbain, I., Raposo, G., Popova, T., Stern, M.H., et al. (2019). PML-Regulated Mitochondrial Metabolism Enhances Chemosensitivity in Human Ovarian Cancers. *Cell Metab.* *29*, 156–173.e10.
17. Gentric, G., Mieulet, V., and Mechta-Grigoriou, F. (2017). Heterogeneity in Cancer Metabolism: New Concepts in an Old Field. *Antioxid. Redox Signal.* *26*, 462–485.
18. Bridges, H.R., Jones, A.J., Pollak, M.N., and Hirst, J. (2014). Effects of metformin and other biguanides on oxidative phosphorylation in mitochondria. *Biochem. J.* *462*, 475–487.
19. Owen, M.R., Doran, E., and Halestrap, A.P. (2000). Evidence that metformin exerts its anti-diabetic effects through inhibition of complex 1 of the mitochondrial respiratory chain. *Biochem. J.* *348*, 607–614.
20. Wheaton, W.W., Weinberg, S.E., Hamanaka, R.B., Soberanes, S., Sullivan, L.B., Anso, E., Glasauer, A., Dufour, E., Mutlu, G.M., Budigner, G.S., and Chandel, N.S. (2014). Metformin inhibits mitochondrial complex I of cancer cells to reduce tumorigenesis. *eLife* *3*, e02242.
21. Pollak, M. (2014). Overcoming Drug Development Bottlenecks With Repurposing: Repurposing Biguanides to Target Energy Metabolism for Cancer Treatment. *Nat. Med.* *20*, 591–593.
22. Rajeshkumar, N.V., Yabuuchi, S., Pai, S.G., De Oliveira, E., Kamphorst, J.J., Rabinowitz, J.D., Tejero, H., Al-Shahrour, F., Hidalgo, M., Maitra, A., and Dang, C.V. (2017). Treatment of Pancreatic Cancer Patient-Derived Xenograft Panel with Metabolic Inhibitors Reveals Efficacy of Phenformin. *Clin. Cancer Res.* *23*, 5639–5647.
23. Kisfalvi, K., Moro, A., Sinnott-Smith, J., Eibl, G., and Rozengurt, E. (2013). Metformin inhibits the growth of human pancreatic cancer xenografts. *Pancreas* *42*, 781–785.
24. Qian, W., Li, J., Chen, K., Jiang, Z., Cheng, L., Zhou, C., Yan, B., Cao, J., Ma, Q., and Duan, W. (2018). Metformin suppresses tumor angiogenesis and enhances the chemosensitivity of gemcitabine in a genetically engineered mouse model of pancreatic cancer. *Life Sci.* *208*, 253–261.
25. Evans, J.M., Donnelly, L.A., Emslie-Smith, A.M., Alessi, D.R., and Morris, A.D. (2005). Metformin and reduced risk of cancer in diabetic patients. *BMJ* *330*, 1304–1305.
26. Kordes, S., Pollak, M.N., Zwinderman, A.H., Mathôt, R.A., Weterman, M.J., Beeker, A., Punt, C.J., Richel, D.J., and Wilmink, J.W. (2015). Metformin in patients with advanced pancreatic cancer: a double-blind, randomised, placebo-controlled phase 2 trial. *Lancet Oncol.* *16*, 839–847.
27. Bhaw-Luximon, A., and Jhurry, D. (2016). Metformin in pancreatic cancer treatment: from clinical trials through basic research to biomarker quantification. *J. Cancer Res. Clin. Oncol.* *142*, 2159–2171.
28. Daemen, A., Peterson, D., Sahu, N., McCord, R., Du, X., Liu, B., Kowanetz, K., Hong, R., Moffat, J., Gao, M., et al. (2015). Metabolite profiling stratifies pancreatic ductal adenocarcinomas into subtypes with distinct sensitivities to metabolic inhibitors. *Proc. Natl. Acad. Sci. USA* *112*, E4410–E4417.
29. Giachin, G., Bouverot, R., Acajaoui, S., Pantalone, S., and Soler-López, M. (2016). Dynamics of Human Mitochondrial Complex I Assembly: Implications for Neurodegenerative Diseases. *Front. Mol. Biosci.* *3*, 43.
30. Bian, B., Bigonnet, M., Gayet, O., Loncle, C., Maignan, A., Gilabert, M., Moutardier, V., Garcia, S., Turrini, O., Delperio, J.R., et al. (2017). Gene expression profiling of patient-derived pancreatic cancer xenografts predicts sensitivity to the BET bromodomain inhibitor JQ1: implications for individualized medicine efforts. *EMBO Mol. Med.* *9*, 482–497.
31. Kovalenko, I., Glasauer, A., Schöckel, L., Sauter, D.R., Ehrmann, A., Sohler, F., Hägebarth, A., Novak, I., and Christian, S. (2016). Identification of KCa3.1 Channel as a Novel Regulator of Oxidative Phosphorylation in a Subset of Pancreatic Carcinoma Cell Lines. *PLOS ONE* *11*, e0160658.
32. Bryant, K.L., Mancias, J.D., Kimmelman, A.C., and Der, C.J. (2014). KRAS: feeding pancreatic cancer proliferation. *Trends Biochem. Sci.* *39*, 91–100.
33. White, E. (2013). Exploiting the bad eating habits of Ras-driven cancers. *Genes Dev.* *27*, 2065–2071.
34. Blum, R., and Kloog, Y. (2014). Metabolism addiction in pancreatic cancer. *Cell Death Dis.* *5*, e1065.
35. Vousden, K.H., and Ryan, K.M. (2009). p53 and metabolism. *Nat. Rev. Cancer* *9*, 691–700.
36. Bulthuis, E.P., Adjobo-Hermans, M.J.W., Willems, P.H.G.M., and Koopman, W.J.H. (2019). Mitochondrial Morphofunction in Mammalian Cells. *Antioxid. Redox Signal.* *30*, 2066–2109.
37. Gayet, O., Loncle, C., Duconseil, P., Gilabert, M., Lopez, M.B., Moutardier, V., Turrini, O., Calvo, E., Ewald, J., Giovannini, M., et al. (2015). A subgroup of pancreatic adenocarcinoma is sensitive to the 5-aza-dC DNA methyltransferase inhibitor. *Oncotarget* *6*, 746–754.
38. Nicolle, R., Blum, Y., Duconseil, P., Vanbrugghe, C., Brandone, N., Poizat, F., Roques, J., Bigonnet, M., Gayet, O., Rubis, M., et al.; BACAP Consortium (2020). Establishment of a pancreatic adenocarcinoma molecular gradient (PAMG) that predicts the clinical outcome of pancreatic cancer. *EBioMedicine* *57*, 102858.
39. Wishart, D.S., Jewison, T., Guo, A.C., Wilson, M., Knox, C., Liu, Y., Djoumbou, Y., Mandal, R., Aziat, F., Dong, E., et al. (2013). HMDB 3.0—The Human Metabolome Database in 2013. *Nucleic Acids Res.* *41*, D801–D807.
40. Lê Cao, K.A., Martin, P.G., Robert-Granié, C., and Besse, P. (2009). Sparse canonical methods for biological data integration: application to a cross-platform study. *BMC Bioinformatics* *10*, 34.
41. Shi, G., DiRenzo, D., Qu, C., Barney, D., Miley, D., and Konieczny, S.F. (2013). Maintenance of acinar cell organization is critical to preventing Kras-induced acinar-ductal metaplasia. *Oncogene* *32*, 1950–1958.
42. Nicolle, R., Blum, Y., Marisa, L., Loncle, C., Gayet, O., Moutardier, V., Turrini, O., Giovannini, M., Bian, B., Bigonnet, M., et al. (2017). Pancreatic Adenocarcinoma Therapeutic Targets Revealed by Tumor-Stroma Cross-Talk Analyses in Patient-Derived Xenografts. *Cell Rep.* *21*, 2458–2470.
43. Wu, H., Ying, M., and Hu, X. (2016). Lactic acidosis switches cancer cells from aerobic glycolysis back to dominant oxidative phosphorylation. *Oncotarget* *7*, 40621–40629.
44. Cavanagh, J., and Rance, M. (1990). Sensitivity improvement in isotropic mixing (Tocsy) experiments. *J. Magn. Reson.* *88*, 72–85.
45. Schleucher, J., Schwendinger, M., Sattler, M., Schmidt, P., Schedletzky, O., Glaser, S.J., Sørensen, O.W., and Griesinger, C. (1994). A general enhancement scheme in heteronuclear multidimensional NMR employing pulsed field gradients. *J. Biomol. NMR* *4*, 301–306.
46. Chou, T.C. (2010). Drug combination studies and their synergy quantification using the Chou-Talalay method. *Cancer Res.* *70*, 440–446.
47. Chou, T.C., and Talalay, P. (1984). Quantitative analysis of dose-effect relationships: the combined effects of multiple drugs or enzyme inhibitors. *Adv. Enzyme Regul.* *22*, 27–55.

STAR★METHODS

KEY RESOURCES TABLE

| REAGENT or RESOURCE                                  | SOURCE                      | IDENTIFIER                       |
|------------------------------------------------------|-----------------------------|----------------------------------|
| <b>Antibodies</b>                                    |                             |                                  |
| anti-Total OXPHOS Human WB Antibody Cocktail         | Abcam                       | Cat# ab110411; RRID: AB_2756818  |
| anti-human NDUFB8                                    | Abcam                       | Cat# ab110242; RRID: AB_10859122 |
| anti-CPT1A                                           | Abcam                       | Cat# ab128568; RRID: AB_11141632 |
| Peroxidase-conjugated secondary antibody (Mouse)     | Santa Cruz Biotechnology    | Cat# sc-2005; RRID: AB_631736    |
| <b>Biological Samples</b>                            |                             |                                  |
| PaCaOmics patient's primary cells                    | <sup>37</sup>               | N/A                              |
| <b>Chemicals, Peptides, and Recombinant Proteins</b> |                             |                                  |
| Serum-free ductal media (SFDM)                       | <sup>37</sup>               | N/A                              |
| DMEM                                                 | Life Technologies           | Cat# 11995                       |
| RPMI                                                 | Life Technologies           | Cat# 21870076                    |
| Fetal Bovine Serum                                   | Lonza                       | Cat# 12103C                      |
| DMEM                                                 | Thermo Fisher Scientific    | Cat# 11966025                    |
| DMEM for Seahorse                                    | Sigma-Aldrich               | Cat# D5030                       |
| Glucose                                              | Sigma Aldrich               | Cat# G8644                       |
| Galactose                                            | Sigma Aldrich               | Cat# G0750                       |
| Sodium pyruvate                                      | Thermo Fisher Scientific    | Cat# 11360070                    |
| L-glutamine                                          | Thermo Fisher Scientific    | Cat# 25030081                    |
| Hygromycine B                                        | Thermo Fisher Scientific    | Cat# H7772                       |
| Accutase                                             | GIBCO                       | Cat# A6964                       |
| MitoTracker Deep Red                                 | Molecular Probes            | Cat# M22426                      |
| Paraformaldehyde                                     | Sigma Aldrich               | Cat# P6148                       |
| ProLong™ Gold antifade reagent with DAPI             | Thermo Fisher Scientific    | Cat# P36931                      |
| Glutaraldehyde                                       | Sigma Aldrich               | Cat# G5882                       |
| Agarose                                              | Sigma Aldrich               | Cat# A2576                       |
| Osmium tetroxide                                     | Electron Microscopy Science | Cat# 19100                       |
| Phenformin                                           | Sigma-Aldrich               | Cat# P7045                       |
| Metformin                                            | Sigma-Aldrich               | Cat# D150959                     |
| Rotenone                                             | Sigma-Aldrich               | Cat# R8875                       |
| Gemcitabine (Gemzar)                                 | Eli Lilly & Co.             | N/A                              |
| Tigecycline                                          | Sigma-Aldrich               | Cat# PZ0021                      |
| Luciferin                                            | Promega                     | Cat# E6552                       |
| Nitrocellulose membranes                             | Pall Gelman Laboratory      | Cat# 60208                       |
| Protease inhibitor cocktail                          | Sigma-Aldrich               | Cat# P8340                       |
| Ponceau red                                          | Sigma-Aldrich               | Cat# BI-PB0437-25G               |
| Triton X-100                                         | EUROMEDEX                   | Cat# 2000-B                      |
| Tween 20                                             | EUROMEDEX                   | Cat# 2001-B                      |
| <b>Critical Commercial Assays</b>                    |                             |                                  |
| Seahorse XF Cell Mito Stress Test Kit                | Agilent Technologies        | Cat# 103015-100                  |
| Seahorse XF Glycolysis Stress Test Kit               | Agilent Technologies        | Cat# 103020-100                  |
| Seahorse XF Mito Fuel Flex Test                      | Agilent Technologies        | Cat# 103260-100                  |
| MITO-ID Membrane potential detection                 | ENZO                        | Cat# 51018                       |
| Bio-Rad Protein Assay                                | Bio-Rad laboratories        | Cat# 5000001                     |

(Continued on next page)

**Continued**

| REAGENT or RESOURCE                           | SOURCE                                                                                                                                | IDENTIFIER                                                                                |
|-----------------------------------------------|---------------------------------------------------------------------------------------------------------------------------------------|-------------------------------------------------------------------------------------------|
| Deposited Data                                |                                                                                                                                       |                                                                                           |
| Original and analyzed data                    | This paper                                                                                                                            | <a href="https://doi.org/10.17632/57vwny5g7j.1">https://doi.org/10.17632/57vwny5g7j.1</a> |
| PaCaOmics RNA-seq data                        | <sup>38</sup>                                                                                                                         | Accession number E-MTAB-5039                                                              |
| NMR metabolites in-house and online databases | <sup>39</sup>                                                                                                                         | N/A                                                                                       |
| Experimental Models: Cell Lines               |                                                                                                                                       |                                                                                           |
| BxPC-3                                        | ATCC                                                                                                                                  | Cat# CRL-1687                                                                             |
| Capan-1                                       | ATCC                                                                                                                                  | Cat# HTB-79                                                                               |
| Capan-2                                       | ATCC                                                                                                                                  | Cat# HTB-80                                                                               |
| MIA PaCa-2                                    | ATCC                                                                                                                                  | Cat# CRM-CRL-1420                                                                         |
| Panc-1                                        | ATCC                                                                                                                                  | Cat# CRL-1469                                                                             |
| SOJ-6                                         | Dr. Eric Mas                                                                                                                          | N/A                                                                                       |
| Experimental Models: Organisms/Strains        |                                                                                                                                       |                                                                                           |
| Mouse: Female Swiss nude (4 week old)         | Charles River                                                                                                                         | Cat# Crl:NU(lco)-Foxn1nu                                                                  |
| Mouse: Female C57BL/6J (4 week old)           | Charles River                                                                                                                         | Cat# C57BL/6 J                                                                            |
| Software and Algorithms                       |                                                                                                                                       |                                                                                           |
| ImageJ                                        | <a href="https://imagej.nih.gov/ij">https://imagej.nih.gov/ij</a>                                                                     | N/A                                                                                       |
| FlowJo version 10.0.7                         | <a href="https://www.flowjo.com/solutions/flowjo">https://www.flowjo.com/solutions/flowjo</a>                                         | N/A                                                                                       |
| GraphPad Prism software                       | <a href="https://www.graphpad.com">https://www.graphpad.com</a>                                                                       | N/A                                                                                       |
| NMRprocflow online software                   | <a href="https://link.springer.com/article/10.1007/s11306-017-1178-y">https://link.springer.com/article/10.1007/s11306-017-1178-y</a> | N/A                                                                                       |
| SIMCA-P + v.14                                | Umetrics                                                                                                                              | N/A                                                                                       |
| lixOmics package                              | <sup>40</sup>                                                                                                                         | N/A                                                                                       |
| Limma package                                 | Bioconductor                                                                                                                          | N/A                                                                                       |

**RESOURCE AVAILABILITY**

**Lead Contact**

Further information and requests for resources and reagents should be directed to and will be fulfilled by the Lead Contact, Alice Carrier ([alice.carrier@inserm.fr](mailto:alice.carrier@inserm.fr)).

**Materials Availability**

This study did not generate new unique reagents.

**Data and Code Availability**

Raw data were deposited on Mendeley at <https://doi.org/10.17632/57vwny5g7j.1>. All data used for this study are available from the lead contact [alice.carrier@inserm.fr](mailto:alice.carrier@inserm.fr) upon request.

**EXPERIMENTAL MODEL AND SUBJECT DETAILS**

**Pancreatic Ductal Adenocarcinoma (PDAC) Cell Lines**

The classical PDAC cell lines (BxPC-3, Capan-1, Capan-2, MIA PaCa-2, and Panc-1) were obtained from the American Type Culture Collection (ATCC, Manassas, VA, USA). The SOJ-6 cell line was kindly provided by Dr. Eric Mas (INSERM U1068, Marseille, France). The classical PDAC cell lines BxPC-3, Capan-1, Capan-2 and SOJ-6 were maintained in RPMI media (GIBCO, Life Technologies) supplemented with 10% fetal bovine serum (FBS; Lonza); MIA PaCa-2 and Panc-1 were maintained in Dulbecco's modified Eagle's medium (DMEM, GIBCO, Life Technologies) supplemented with 10% FBS. The authentication was performed by the ATCC for all cell lines except SOJ-6.

The murine PDAC cell line KPC luc2 (LSL-Kras<sup>G12D/+</sup>; Trp53<sup>R172H/+</sup>; Elas-CreER, transfected with a luciferase-encoding vector) was a gift from Dr. Nathalie Auphan-Anezin (CIML, Marseille, France). The KPC cell line was originally obtained by S.F. Konieczny

(West Lafayette, USA) from a pancreatic tumor in a KPC mouse on C57BL/6 background.<sup>41</sup> KPC luc2 cells were maintained in RPMI medium supplemented with 10% FBS and 600  $\mu\text{g/ml}$  Hygromycin B (ThermoFisher Scientific) for selection of cells containing the luciferase-encoding vector.

All cell lines were cultured at 37°C with 5% CO<sub>2</sub> in a humidified atmosphere. Cells were harvested using Accutase (GIBCO) and reseeded once or twice per week. Cell lines were regularly tested for Mycoplasma contamination and found to be negative.

### Xenografts and allografts mouse models

The orthotopic xenografts were generated using the human PDAC classical cell lines Panc-1 and MIA PaCa-2. Cells were maintained as described above and harvested at exponential growth for implantation into the pancreas of recipient mice. Six-week-old athymic female Swiss Nude mice, SOPF (Specific and Opportunistic Pathogen Free) health status, strain Crl:Nu(lco)-Foxn1<sup>nu</sup> (Charles River France), were used. Grafting experiments were implemented by surgery under isoflurane anesthesia to perform intrapancreatic parenchymal injection of one and two millions of MIA PaCa-2 and Panc-1 cells, respectively.

The presence of a pancreatic tumor was confirmed by exploratory laparotomy on day 16 and day 33 post-grafting in MIA PaCa-2 and Panc-1 xenografts, respectively. After surgery recovery, randomization prior to treatment was carried out and mice were assigned to four groups (at least  $n = 5$  per condition) and injected intraperitoneally with PBS (vehicle control), Gemcitabine (120 mg/kg twice a week), Phenformin (50 mg/kg daily), and combination Gemcitabine and Phenformin at the same dose. Four weeks after the start of treatment, mice were sacrificed by cervical dislocation, necropsy was performed, and pancreatic tumors were weighed.

Orthotopic syngeneic allografts were generated by intraperitoneal injection of one million of the murine cells KPC luc2 into 6-week-old female C57BL/6 mice (immunocompetent strain, SOPF health status, Charles River, France). Tumoral growth was followed by bioluminescence upon injection of 3 mg luciferin-EF (Promega) using a Photon Imager device (Biospace Lab). On day 11 post-grafting, mice were randomized to four treatments cohorts (at least  $n = 5$  per condition) as done for xenografts. Mice were sacrificed by cervical dislocation when the non-treated mice (vehicle-injected as controls) reached the ethical limit point on day 17, necropsy was performed and pancreatic tumors were weighed.

All mice were kept under specific pathogen-free conditions and according to the current European regulation; the experimental protocol was approved by the Institutional Animal Care and Use Committee (#16711).

### PaCaOmics patient's cohort

This cohort has been well described.<sup>30,37,38,42</sup> Briefly, 75 patients of this cohort with a confirmed PDAC diagnosis were included in this study. Tumor samples were obtained from pancreatectomy, Endoscopic ultrasound-guided fine needle aspiration (EUS-FNA) biopsy, carcinomatosis or liver metastasis during exploratory laparotomy. All samples were xenografted in immunocompromised mice to generate Patient-Derived Xenografts (PDX) samples as described previously.<sup>37,38</sup> Briefly, PDAC tumors were fragmented into pieces, mixed with Matrigel, and subcutaneously implanted in 5- to 6-week-old immunocompromised male mice (Swiss Nude; strain Crl: NU(lco)-Foxn1<sup>nu</sup>; Charles River, Wilmington, MA). Forty-four primary cells were obtained from these PDX as described.<sup>37</sup> Briefly, the xenograft pieces were minced, treated with collagenase and trypsin/EDTA, suspended in DMEM supplemented with Penicillin/Streptomycin and FBS, then in Serum Free Ductal Media (SFDM). These PaCaOmics primary cells were maintained in SFDM at 37°C with 5% CO<sub>2</sub> in a humidified atmosphere. Cells were harvested and reseeded similarly to the classical PDAC cell lines and maintained for a maximum of 10 passages. Next Generation Sequencing of RNA (RNA-Seq) from the 75 PDX and the 44 primary cells is published elsewhere (accession number E-MTAB-5039).<sup>38</sup>

In the present study, 21 of the primary cells were used for the Seahorse analysis, RNA-Seq data of these 21 primary cells were used for transcriptomics analysis, and RNA-Seq data of the 75 PDX were used for the survival curve shown in [Figure 3F](#).

## METHOD DETAILS

### Real-time metabolic analysis

Measurements were performed using the Seahorse Bioscience XFe24 Extracellular Flux Analyzer (Agilent). This device allows the measurement of the cellular oxygen consumption rate (OCR in pmoles/min) and of the extracellular acidification rate (ECAR in mpH/min), for mitochondrial respiration (OXPHOS) and glycolysis, respectively. Sixteen hours before the assay, cells at exponential growth were seeded into Seahorse 24-well plates and cultured at 37°C with 5% CO<sub>2</sub>. The number of seeded cells was optimized to ensure 70%–80% confluence the day of analysis ([Table S1](#)).

### XF Cell Mito Stress Test (OXPHOS experiment)

OCR was measured using the Seahorse XF Cell Mito Stress Test Kit. Culture medium was replaced with OXPHOS assay medium (DMEM without phenol red [Sigma-Aldrich reference D5030], 143 mM NaCl, 2 mM glutamine, 1 mM sodium pyruvate and 10 mM glucose, pH 7.4) and the plate was pre-incubated for 1 h at 37°C in a non-CO<sub>2</sub> incubator. OCR was measured under basal conditions, and then after sequential injections of different reagents: 1  $\mu\text{M}$  oligomycin (respiratory Complex V inhibitor that allows to calculate ATP production by mitochondrion), carbonyl cyanide-p-trifluoromethoxy-phenyl-hydrazon (FCCP; an uncoupling agent allowing determination of the maximal respiration and the spare capacity; the concentration was optimized for each cell line, [Table S1](#)),



and finally 0.5  $\mu\text{M}$  rotenone + 0.5  $\mu\text{M}$  antimycin A (Complex I and III inhibitors, respectively) to stop mitochondrial respiration enabling the calculation of the background (i.e., non-mitochondrial respiration driven by processes outside the mitochondria). Levels of OCR were normalized to 10,000 seeded cells, which we found as the most accurate way to normalize when comparing different cell types.

### **XF Glycolysis Stress Test (Glycolysis experiment)**

ECAR was measured using the Seahorse XF Glycolysis Stress Test Kit. Culture medium was replaced with glycolysis assay medium (DMEM without phenol red, 143 mM NaCl, 2 mM glutamine, pH 7.4) and the plate was pre-incubated for 1 h at 37°C in a non-CO<sub>2</sub> incubator. ECAR was first measured from non-glycolytic acidification (background), and then after sequential injections of different reagents. For basal glycolysis calculation, 10 mM glucose was injected, and glycolytic capacity was then calculated following the injection of 1  $\mu\text{M}$  oligomycin. Glycolytic reserve was calculated as the difference between glycolytic capacity and basal glycolysis. At the end of the experiment, glycolysis was stopped by adding 2-Deoxyglucose (100 mM). Levels of ECAR were normalized to 10,000 seeded cells.

The contribution of OXPHOS and glycolysis to ATP production was calculated using the OCR and proton production rate (PPR) as previously described.<sup>43</sup> Glycolysis was also measured using the recently developed XF Glycolytic Rate Assay (no glucose starvation required for background determination) with the same outcomes, suggesting that glucose starvation has no impact on glycolysis in PDAC cell lines.

### **XF Mito Fuel Flex Test**

The Seahorse XF Mito Fuel Flex Test Kit was used to determine dependency and flexibility of cells to oxidize three critical mitochondrial fuels: glucose, glutamine, and fatty acids. Culture medium was replaced by OXPHOS assay medium and the plate was pre-incubated for 1 h at 37°C in a non-CO<sub>2</sub> incubator. Inhibitors of mitochondrial pyruvate carrier (UK5099 2  $\mu\text{M}$ ), glutaminase (BPTES 3  $\mu\text{M}$ ), and carnitine palmitoyl-transferase 1A (Etomoxir 4  $\mu\text{M}$ ) were used. The rate of oxidation of each fuel was determined by measuring OCR in the presence or absence of fuel pathway inhibitors according to the manufacturers' instructions.

### **Flow cytometry**

#### **Mitochondrial mass measurement**

Cells were seeded in 12-well plates (175,000 cells per well). The day after, MitoTracker Deep Red (Molecular Probes) was added in culture medium to a final concentration of 200 nM for 10 min. After incubation, cells were washed with warm PBS, detached with Accutase, and resuspended in HBSS (GIBCO, Life Technologies) for flow cytometry. Ten thousand events per sample were acquired in a MACSQuant-VYB (Miltenyi Biotec) and data analysis was performed using FlowJo software.

#### **Mitochondrial membrane potential**

Measurement was performed using the MITO-ID Membrane potential detection kit (ENZ-51018) according to the manufacturer's protocol. Briefly, cells were collected, washed, and preincubated in 500  $\mu\text{L}$  of the Assay Solution containing 5  $\mu\text{L}$  of MITO-ID MP Detection Reagent for 15 min. Then, 10,000 events per sample were acquired in a MACSQuant-VYB and orange fluorescence data analysis was performed using the FlowJo software.

### **Fluorescence microscopy**

#### **Mitochondrial network**

Cells were seeded on coverslips in 12-well plates (200,000 cells per well). The day after, the mitochondrial network was analyzed by incubation of cells in the presence of MitoTracker DeepRed FM (200 nM, Molecular Probes) at 37°C for 30 min. Then, cells were washed twice with PBS and fixed with warm 4% paraformaldehyde. Finally, samples were mounted using the ProLong™ Gold anti-fade reagent with DAPI. Confocal images were acquired using an inverted microscope equipped with LSM 880 with Airyscan detector controlled by Zeiss Zen Black, 63x lens.

### **Transmission Electron Microscopy (TEM)**

The cells at exponential growth were fixed in 37°C-warm 4% paraformaldehyde and 2.5% Glutaraldehyde in PBS overnight. The next day, the plates were washed three times in PBS at RT. The cells were then scraped in PBS, transferred in a 2 mL microtube and pelleted by centrifugation for 5 min at 5000 rpm. The supernatant was removed, the cells were resuspended in 2% 37°C-warm low-melting-point agarose and transferred into microvettes (Sarstedt) and pelleted by centrifugation for 5 min at 5000 rpm. The microvettes were then placed on ice for 10 minutes. The microvettes tips were then removed with a razor blade and the agarose-embedded cell pellet was processed through a classical protocol for TEM. Briefly, the pellets were post-fixed in aqueous 1% OsO<sub>4</sub> for one hour, and left overnight in aqueous 1% uranyl acetate. The next day, the pellets were dehydrated in graded series of ethanol baths (10 minutes each) and infiltrated with epon resin in ethanol (1:3, 2:2, 3:1, 2 hours each and pure resin overnight). The next day the pellets were embedded in fresh pure epon resin and cured for 48h at 60°C. Seventy nm-ultrathin sections were performed on a Leica UCT Ultramicrotome (Leica, Austria) and deposited on formvar-coated slot grids. The grids were contrasted using lead citrate and observed in an FEI Tecnai G2 at 200 KeV. Acquisition was performed on a Veleta camera (Olympus, Japan).

## Immunoblotting

For each cell line, at least two different culture passages were analyzed by western blotting (WB), and at least 3 immunoblots were made for each tested protein. Cells at exponential growth were resuspended in lysis buffer (HEPES 50 mM, NaCl 150 mM, Triton X-100 1%, EDTA 1 mM, EGTA 1 mM, glycerol 10%, NaF 25 mM, ZnCl<sub>2</sub> 10 μM) with a cocktail of protease and phosphatase inhibitors added freshly. Protein concentrations were determined using the Bio-Rad Protein Assay (Bio-Rad laboratories, France). Proteins (50 μg) were resolved by SDS-PAGE, and transferred to nitrocellulose membranes. All membranes were systematically stained with Ponceau red to confirm equal protein loading and transfer, since usual normalization with so-called house-keeping proteins cannot be made as these proteins are variable in between PDAC cells (data not shown). Then membranes were blocked 1h at room temperature with TBS 5% milk, and incubated overnight in TBS 5% milk 0.1% Tween containing appropriate primary antibodies: CPT1A (1:500; Abcam #ab128569), Total OXPHOS Human WB Antibody Cocktail (1:100; Abcam #ab110411), NDUFB8 (1:2000; Abcam #ab110242). After three washes in TBS 0.1% Tween, membranes were incubated 1h at RT with a HRP-conjugated secondary antibody at 1:5000 before being revealed with ECL. Acquisition was performed with a Fusion FX7 imager (Vilber-Lourmat, France).

## <sup>1</sup>H High Resolution Magic Angle Spinning-Nuclear Magnetic Resonance (HRMAS NMR) spectroscopy

For each sample, ten microliters of D<sub>2</sub>O were added to the cell pellet (5 × 10<sup>6</sup> cells), mixed and placed into a 30 μL disposable insert. The insert was then placed into a 4 mm ZrO<sub>2</sub> HRMAS rotor. All NMR experiments were carried out on a Bruker Advance III spectrometer operating at 400 MHz for the <sup>1</sup>H frequency equipped with a <sup>1</sup>H/<sup>13</sup>C/<sup>31</sup>P HRMAS probe. Spectra were recorded at 277K with a spin rate of 4 kHz. A Carr-Purcell-Meiboom-Gill (CPMG) NMR spin echo sequence [90° – (τ – 180° – τ)η] with an effective spin echo time of 37.5 ms, preceded by a water presaturation pulse during a relaxation time of 2 s to reduce the signal intensities of lipids and macromolecules. For each spectrum, 380 free induction decays (FID) of 26624 complex data points were collected using a spectral width of 8000 Hz. Each FID was then multiplied by an exponential weighting function corresponding to a line broadening of 0.3 Hz and zero-filled prior to Fourier transformation. Subsequently, each spectrum was phased and referenced to the alanine signal (δ = 1.46 ppm). Assignments of the NMR signals were performed using 1H–1H TOCSY spectrum,<sup>44</sup> 1H–<sup>13</sup>C HSQC spectrum,<sup>45</sup> in-house and online databases.<sup>39</sup> <sup>1</sup>H HRMAS NMR spectra were exported to NMRproflow online software (10.1007/s11306-017-1178-y) to be baseline and signal shift corrected, and divided into 0.005 ppm-width buckets. To remove the effect of water suppression, the region between 4.70 and 5.27 ppm was discarded. The dataset was then normalized to the number of cells. Finally, the matrix was exported to the SIMCA-P + v.14 software (Umetrics, Umea, Sweden) for multivariate statistical analysis. First, Principal Component Analysis (PCA) was performed in order to check the homogeneity of the dataset. Orthogonalized Projections on Latent Structure Discriminant Analysis (OPLSDA) was then applied to a subset of the data matrix composed of Panc-1, BxPC-3 and MIA PaCa-2 samples in order to target metabolic differences between OXPHOS and glycolytic samples. The resulting score and loading plots were used to visualize the discriminant features. A leave-one out internal cross-validation was performed in order to calculate Q<sup>2</sup> and R<sup>2</sup><sub>Y</sub> values representing, respectively, the predictive capability and the sensitivity of the model, as well as the CV-ANOVA p value and to ensure the robustness of the statistical model. The integration of each discriminant signal, which represents the relative concentration of the corresponding metabolites, was then exported to Metaboanalyst online software (<https://doi.org/10.1093/nar/gky310>) and a heatmap was calculated based on autoscaled features.

## Canonical correlation analysis

The canonical correlation analysis between transcriptome of primary PDAC cells derived from PDX and OCR+ECAR data (from Seahorse analysis) was performed by PLS approach (Partial least square) using the 2 first component (IixOmics package).<sup>40</sup> To focus on genes more specifically correlated with OCR, we chose to focus on the component that shows opposite loading values of OCR and ECAR. For biological interpretation of the component of interest, we performed a gene set enrichment analysis on its loading values. The p values were adjusted for false discovery rate (FDR).

## Differential gene expression analysis

The differential expression analysis between high and low OXPHOS groups was performed with Limma package (Bioconductor). GSEA analysis was performed to assess the enriched pathways using the logFold change statistic with the package fGSEA (Bioconductor).

## Chemograms

Cells were seeded in 96-well plates (5,000 cells per well). Twenty-four hours later, the medium was supplemented with increasing concentrations of selected drugs in triplicates: Phenformin, Metformin, Rotenone (all provided by Sigma-Aldrich, Saint-Quentin Fallavier, France), and Gemcitabine. Rotenone that has to be dissolved in chloroform was prepared as 200x stock solution. Cell viability was determined 72h later by Crystal violet viability assay which is independent from cell metabolism. Briefly, cells were fixed in Glutaraldehyde 1%, washed twice with PBS, stained with crystal violet 0.1% for 10 min, then washed three times with PBS. Crystals were solubilized in SDS 1%, and absorbance was measured at 600 nm with Epoch-Biotek spectrophotometer.

For the combination treatment, we used Phenformin at 0.5 mM (IC<sub>50</sub>) with increasing doses of Gemcitabine. Combination index (CI) values were calculated for all tested drug concentrations according to the Chou and Talalay method<sup>46,47</sup> using the following

equation:  $CI = (D)_1 / (D_x)_1 + (D)_2 / (D_x)_2$  where  $(D)_1$  and  $(D)_2$  represent the dose of agent 1 and 2 used in combination to induce X% growth inhibition, and  $(D_x)_1$  and  $(D_x)_2$  represent the dose of agent 1 and 2 required to reach X% growth inhibition when used alone. The CI theorem then provides quantitative definition for additive effects ( $0.8 \leq CI \leq 1.2$ ), synergism ( $CI < 0.8$ ) and antagonism ( $CI > 1.2$ ) in drug combinations. Calculations were done with Graphpad Prism software (GraphPad Software Inc., La Jolla, CA).

### OXPHOS shift assays

Panc-1 cells were forced to shift from high OXPPOS to low OXPPOS status by disruption of mitochondrial metabolism by treatment with Tigecycline (Sigma-Aldrich; inhibiting mitochondrial protein synthesis), as reported.<sup>15</sup> Panc-1 cells were seeded in 96-well plates (5,000 cells per well). Twenty-four hours later, the medium was supplemented with Gemcitabine (1 or 4 nM) and Tig (50  $\mu$ M). Cell viability was determined 72h later by Crystal violet viability assay.

MIA PaCa-2 and BxPC-3 cells were forced to shift from low OXPPOS to high OXPPOS status by culture in Galactose instead of Glucose, as reported.<sup>15</sup> MIA PaCa-2 and BxPC-3 cells were cultivated for 3 weeks (equivalent to 6 consecutive passages) in DMEM (ThermoFisher Ref 11966025) supplemented with either Glucose (25 mM) or galactose (10 mM) as sole source of carbon. In galactose, proliferation of the cells is first decreased, then gradually after 4-5 passages cells recover their regular (i.e., in media containing glucose) proliferation rate.

After this adaptation, the cells were seeded in 96-well plates (5,000 cells per well), Gemcitabine (4 nM) was added in the medium 24 hours later, and cell viability was determined 72h later by Crystal violet viability assay.

### In vivo experiments

Orthotopic xenografts were made using the classical human PDAC cell lines Panc-1 and MIA PaCa-2 (ATCC, Manassas, VA, USA). Cells were cultured and maintained with DMEM supplemented with 10% FBS at 37°C with 5% CO<sub>2</sub> in a humidified atmosphere. After early passages, cells at exponential growth were harvested with Accutase (GIBCO) and two million Panc-1 or one million MIA PaCa-2 cell suspensions (in a 50  $\mu$ l volume of DMEM without FBS), were implanted into the pancreas of recipient mice. Six-week-old (at the time of transplant) athymic female Swiss Nude mice, SOPF (Specific and Opportunistic Pathogen Free) health status, strain Crl:Nu(lco)-Foxn1nu (Charles River, France) were used. Grafting experiments were implemented by surgery under isoflurane anesthesia to perform intrapancreatic parenchymal injection of PDAC cells. The presence of a pancreatic tumor was confirmed by exploratory laparotomy on day 16 (MIA PaCa-2) or day 33 (Panc-1). After surgery recovery (one week), randomization prior to treatment was carried out and mice were assigned to four groups (at least n = 5 per condition) and injected intraperitoneally with PBS (vehicle control), Gemcitabine (120 mg/kg twice a week), Phenformin (50 mg/kg daily), and combination Gemcitabine and Phenformin at the same dose. Drugs were freshly prepared in PBS prior injection. Four weeks after the start of treatment, mice were sacrificed by cervical dislocation, necropsy was performed, and pancreatic tumors were weighed.

Orthotopic syngeneic allografts were obtained by intraperitoneal injection of one million KPC luc2 cell suspension (in a 100  $\mu$ l volume of PBS) in 6-week-old female C57BL/6 mice (immunocompetent strain, SOPF health status, Charles River, France). The KPC luc2 cells are endowed with a high capacity to home into the pancreas and develop a pancreatic tumor. Tumoral growth was followed by bioluminescence (starting on day 3 post-inoculation and continuing on days 10, 14 and 17) upon injection of 3 mg luciferin-EF (Promega) using a Photon Imager device (Biospace Lab). On day 11 post-grafting, mice were randomized to four treatments cohorts (at least n = 5 per condition) as done for xenografts. Mice were sacrificed by cervical dislocation when the non-treated mice (vehicle-injected as controls) reached the ethical limit point on day 17, necropsy was performed and pancreatic tumors were weighed.

All mice were kept under specific pathogen-free conditions and according to the current European regulation; the experimental protocol was approved by the Institutional Animal Care and Use Committee (#16711).

### QUANTIFICATION AND STATISTICAL ANALYSIS

Results are expressed as the mean  $\pm$  SEM of triplicates, and at least three independent experiments were done for each analysis. Statistical analysis of data was performed by one-way analysis of variance (ANOVA) except for the immunoblot data (two-tailed unpaired Student's t test) and *in vivo* data (Mann-Whitney U test). The log-rank statistic test was applied to the Kaplan-Meier survival curves. p values < 0.05 were considered statistically significant.

**Cell Reports Medicine, Volume 1**

**Supplemental Information**

**Targeting Mitochondrial Complex I**

**Overcomes Chemoresistance in**

**High OXPHOS Pancreatic Cancer**

**Rawand Masoud, Gabriela Reyes-Castellanos, Sophie Lac, Julie Garcia, Samir Dou, Laetitia Shintu, Nadine Abdel Hadi, Tristan Gicquel, Abdessamad El Kaoutari, Binta Diémé, Fabrice Tranchida, Laurie Cormareche, Laurence Borge, Odile Gayet, Eddy Pasquier, Nelson Dusetti, Juan Iovanna, and Alice Carrier**

## SUPPLEMENTAL INFORMATION

### Targeting mitochondrial Complex I overcomes chemoresistance in high OXPHOS pancreatic cancer

Rawand Masoud<sup>1†\*</sup>, Gabriela Reyes-Castellanos<sup>1†</sup>, Sophie Lac<sup>1‡</sup>, Julie Garcia<sup>1</sup>, Samir Dou<sup>1</sup>, Laetitia Shintu<sup>2</sup>, Nadine Abdel Hadi<sup>1</sup>, Tristan Gicquel<sup>1</sup>, Abdessamad El Kaoutari<sup>1</sup>, Binta Diémé<sup>2§</sup>, Fabrice Tranchida<sup>2</sup>, Laurie Cormareche<sup>1</sup>, Laurence Borge<sup>1</sup>, Odile Gayet<sup>1</sup>, Eddy Pasquier<sup>1</sup>, Nelson Dusetti<sup>1</sup>, Juan Iovanna<sup>1</sup>, Alice Carrier<sup>1\*#</sup>

#### **Affiliations:**

<sup>1</sup>Aix Marseille Université, CNRS, INSERM, Institut Paoli-Calmettes, Centre de Recherche en Cancérologie de Marseille (CRCM), F-13009 Marseille, France.

<sup>2</sup>Aix Marseille Université, CNRS, Centrale Marseille, ISM2, F-13013 Marseille, France

\*To whom correspondence should be addressed: Alice Carrier and Rawand Masoud, Centre de Recherche en Cancérologie de Marseille (CRCM), Campus de Luminy Case 915, 163 Avenue de Luminy, 13288 Marseille Cedex 9, France. Phone : +33 491828829 ; Fax : +33 491826083. Email: [alice.carrier@inserm.fr](mailto:alice.carrier@inserm.fr) and [rawand.masoud@inserm.fr](mailto:rawand.masoud@inserm.fr).

† These authors contributed equally

‡ Current address: Innate Pharma, F-13009 Marseille

§ Current address: Institut de Chimie de Clermont-Ferrand, PlateForme d'Exploration du Métabolisme (PFEM), Université Clermont-Auvergne, F-63000 Clermont-Ferrand, France

# Lead contact

#### **List of supplementary data:**

Supplementary Figures: 9

Supplementary Tables: 2

**A**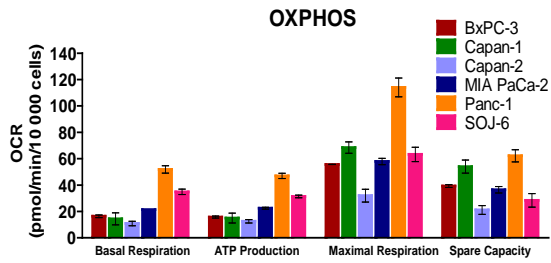**B**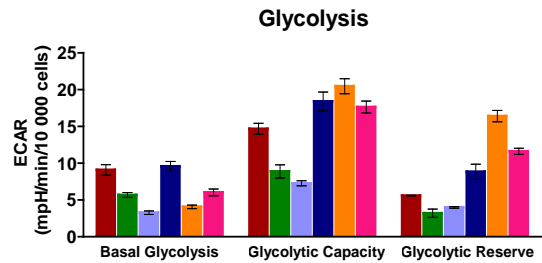**C**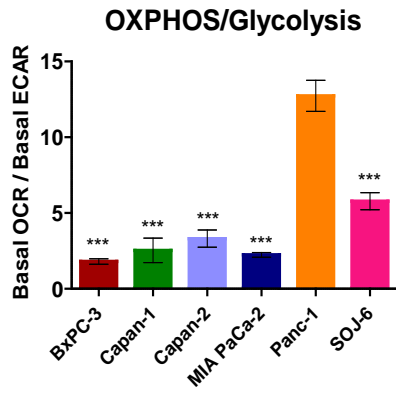**D**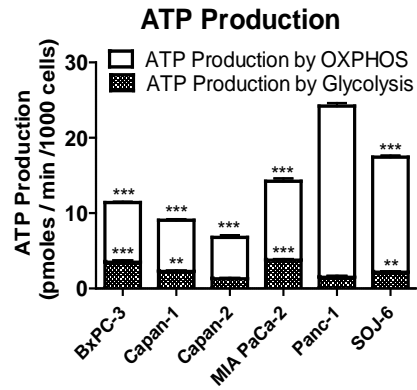**E**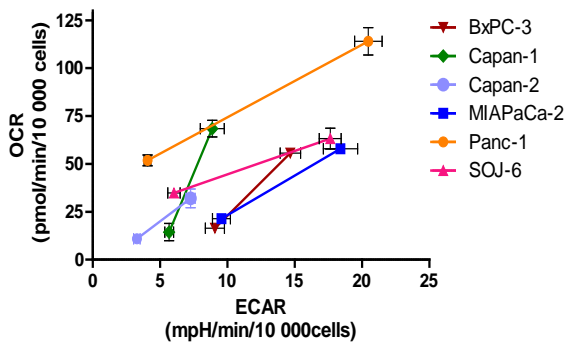**F**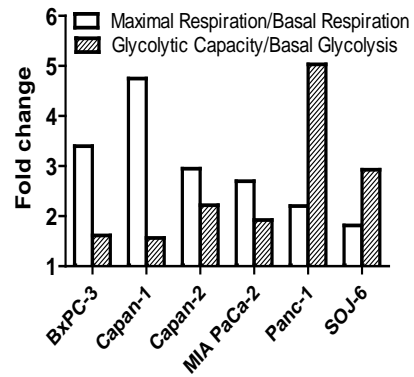**G**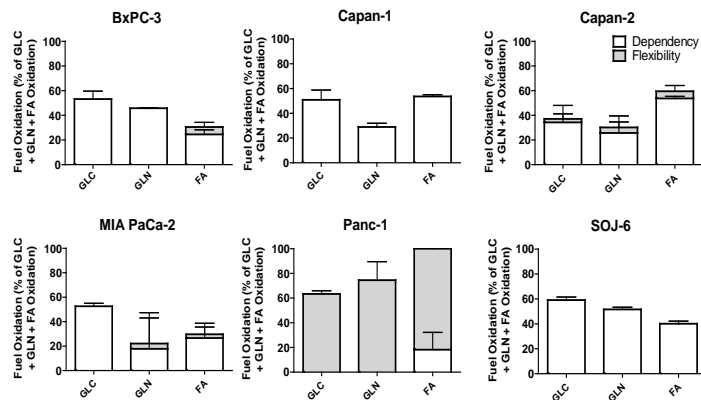

**Supplementary Figure 1. Mitochondrial metabolism is efficient in pancreatic cancer cells (related to Figure 1A - C).** (A, B) Quantification of representative profiles obtained for OXPHOS (A) and glycolysis (B) experiments for the six classical PDAC cell lines. (A) The rates of OCR (mean of triplicates  $\pm$  SEM) for basal respiration, mitochondrial ATP production, maximal respiration and spare capacity were quantified as described in the Materials and Methods section, and normalized to 10,000 seeded cells. This graph is representative of at least three independent experiments. (B) The rates of ECAR (mean of triplicates  $\pm$  SEM) for glycolysis, glycolytic capacity, and glycolytic reserve were quantified as described in the Materials and Methods section, and normalized to 10,000 seeded cells. This graph is representative of at least three independent experiments. (C) Ratio of basal OCR to basal ECAR. Statistically significant differences between Panc-1 cells with the 5 others \*\*\*  $p < 0.001$ . (D) ATP production by OXPHOS and glycolysis was determined by the OCR and proton production rate, respectively. Statistically significant differences between the Panc-1 cell line with the 5 other cell lines: \*\* and \*\*\*  $p < 0.01$  and  $p < 0.001$  respectively. (E-F) Two different representations of cell metabolic plasticity. (E) OCR versus ECAR plot showing for each cell line basal OCR and ECAR linked by a line with maximal OCR and ECAR. (F) Fold change levels of maximal respiration to basal respiration and fold change levels of glycolytic capacity to basal glycolysis were determined for each PDAC cell line. (G) Pancreatic cancer cells demonstrate different degrees of dependency and flexibility towards essential TCA fuels. OCR was measured when cells were challenged with fuel pathway inhibitors: UK5099, BPTES, and Etomoxir, targeting Glucose (GLC), Glutamine (GLN), and Fatty Acids (FA) pathways, respectively. The dependency and flexibility of cells to oxidize these three critical mitochondrial fuels were determined as described in the Supplementary Materials and Methods section. Data are presented as the mean of triplicates  $\pm$  SEM. Data are representative of three independent experiments.

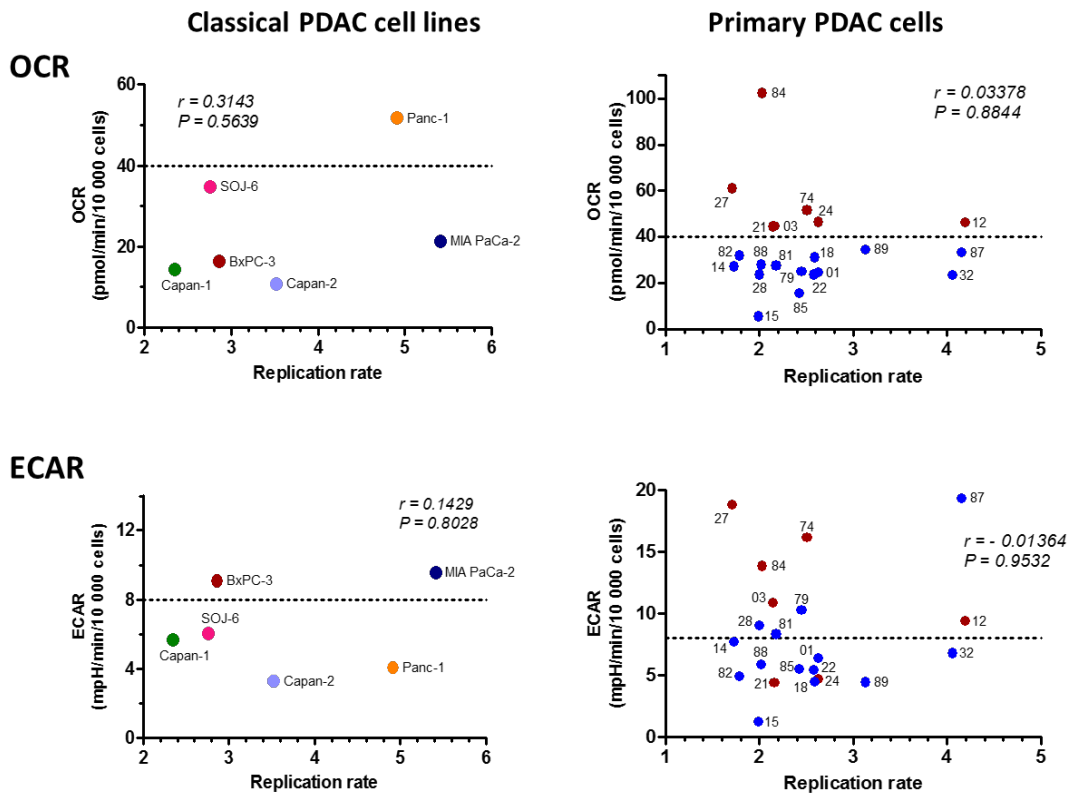

**Supplementary Figure 2. The metabolic status of PDAC cells is unrelated to their proliferation rate (related to Figure 1).** The replication rate in 72 hours was monitored by PrestoBlue labelling of cells seeded in 96-well plate the day after the seeding (D0) and 3 days later (D3), as described in Gayet *et al.*, 2015. The scatterplots display the replication rate and the corresponding basal OCR or basal ECAR, of both classical PDAC cell lines (left) and the 21 primary PDAC cells (right). High and low OXPHOS primary PDAC cells are in red and blue dots, respectively, and identified with a short version of the anonymized name of patients. The horizontal dotted line indicates the threshold that we selected in Figure 1C and D between high and low OCR or ECAR. Spearman's correlation coefficient and p values are shown, indicating none or very weak association between the two variables, with non-statistically significant values in any of the cases.



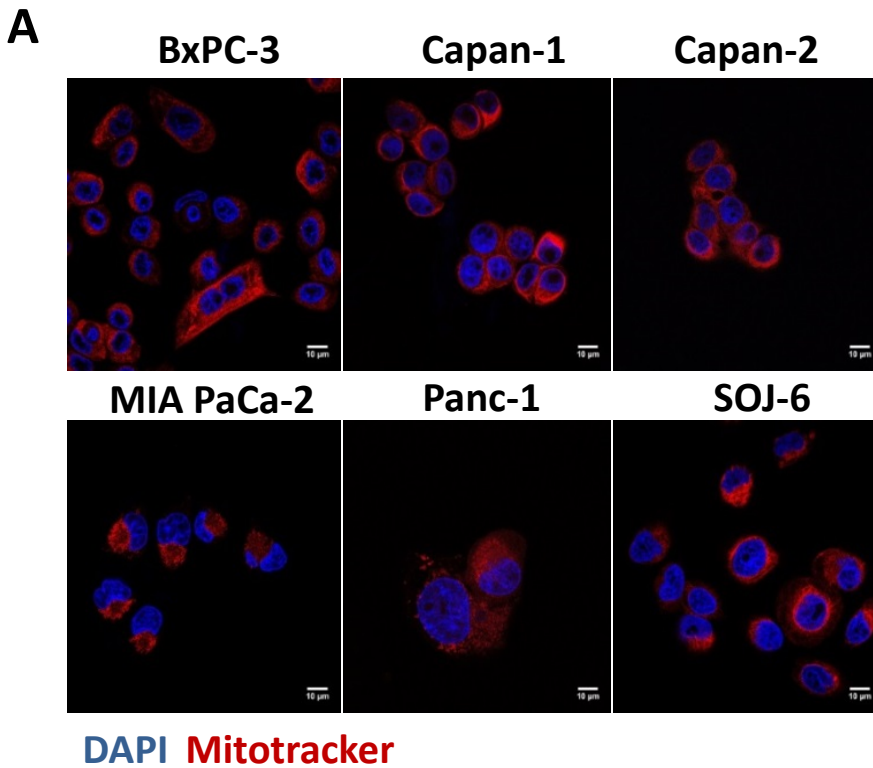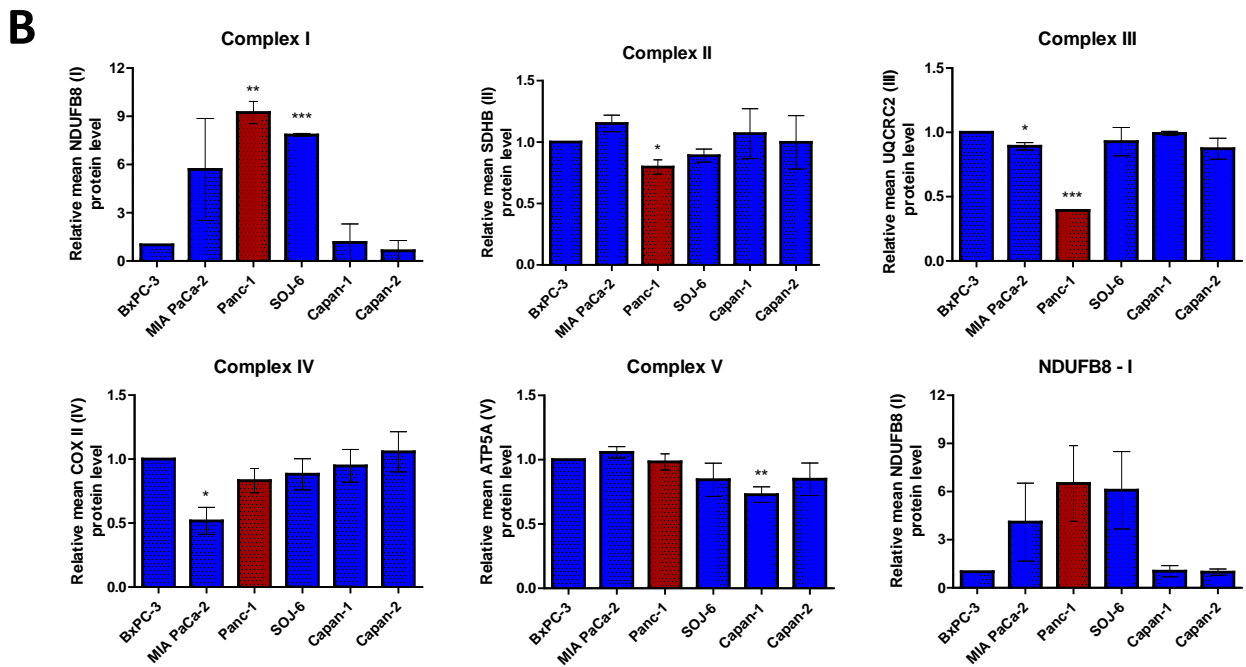

**Supplementary Figure 3. Abundance of respiratory Complex I reflects respiration activity (related to Figure 2A - F).** (A) Representative confocal microscopy images of stained cells with MitoTracker DeepRed (red) and DAPI (blue) are shown. (B) Mitochondrial complexes protein levels were quantified on WB by Image J, normalized to BxPC-3 cell line, and the mean of 3 different WB was calculated (\*, \*\* and \*\*\*  $p < 0.05$ ,  $p < 0.01$  and  $p < 0.001$  respectively). The last graph (NDUFB8-I) corresponds to the Western blot using the anti-NDUFB8 antibody alone.

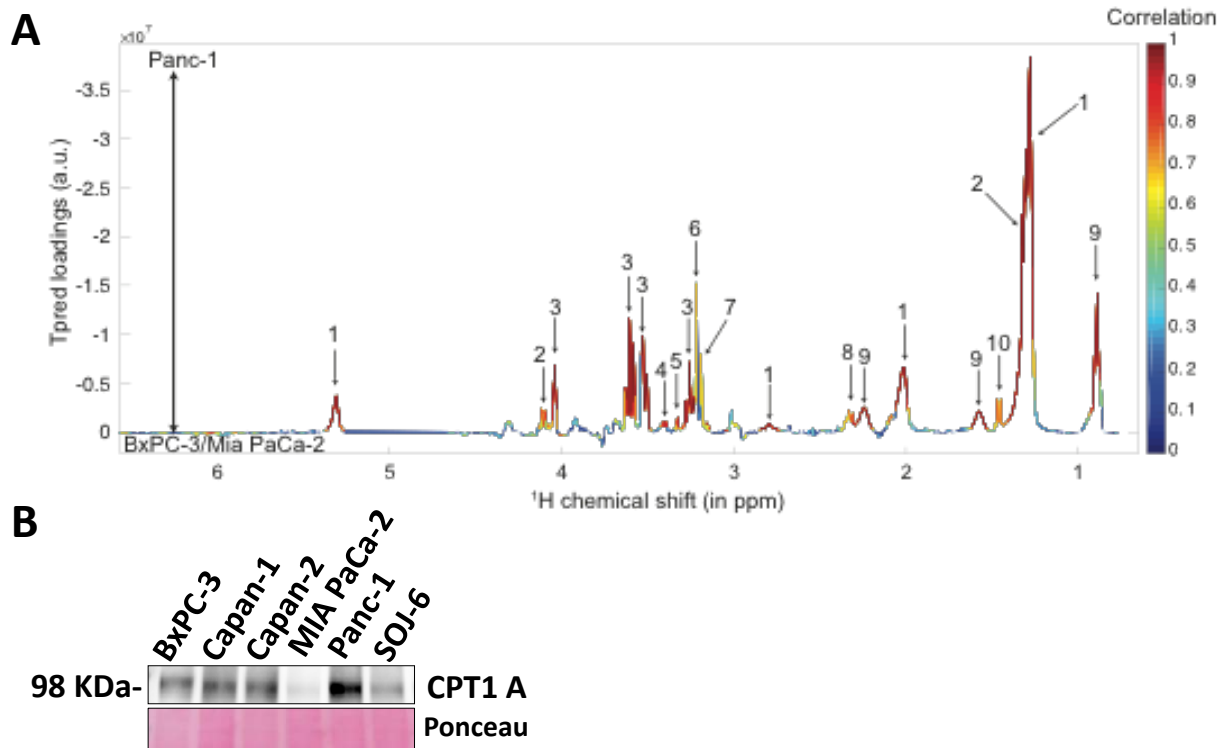

**Supplementary Figure 4. High OXPHOS Panc-1 cells show metabolic specificities (related to Figure 2G).** (A) Representative profile of metabolic analysis by HRMAS-NMR. OPLSDA predictive component loading plot showing the weights of each NMR variable in the discrimination in OXPHOS Panc-1 cells (Top part) versus glycolytic BxPC-3/MIA PaCa-2 cells (Bottom part). The NMR variables are color-coded according to their correlation coefficients with the predictive component. Significantly discriminant metabolites were annotated on the loading plot. 1: unsaturated fatty acids; 2: lactate; 3: myo-inositol; 4: proline/taurine; 5: scyllo-inositol; 6: glycerophosphocholine/phosphocholine; 7: choline; 8: glutamate; 9: fatty acids; 10: alanine. (B) CPT1A Western blotting for the classical PDAC cell lines. Ponceau coloration is shown as control of equal protein loading.

**A**

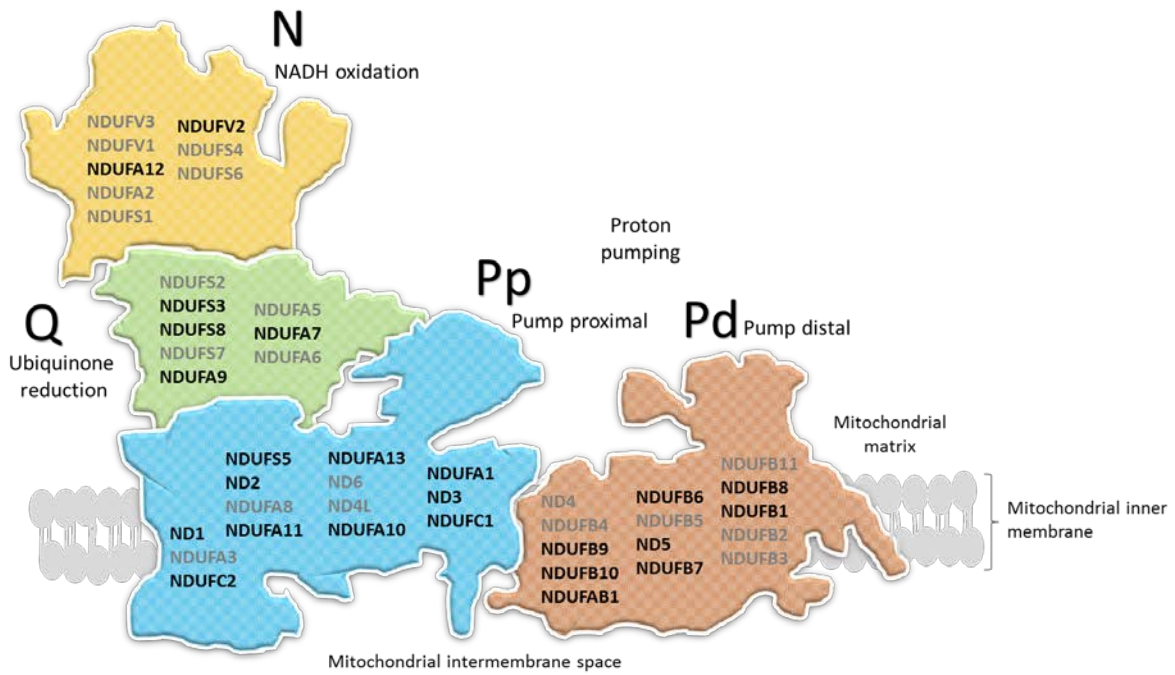

**B**

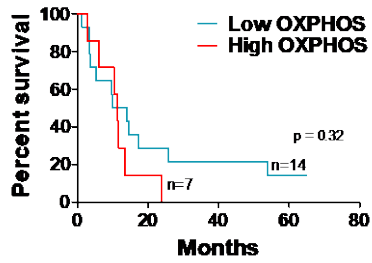

**C**

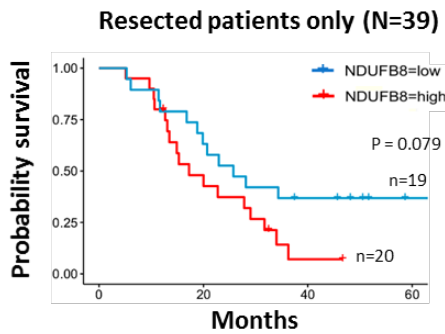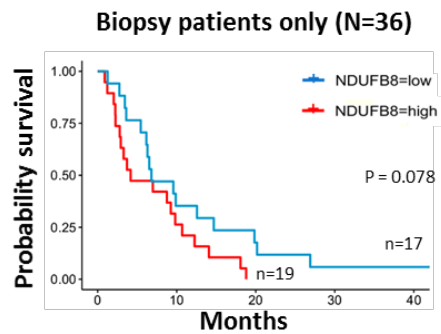

**Supplementary Figure 5. Enrichment of mitochondrial respiratory chain Complex I in high OXPHOS PDAC patients (related to Figure 3 and Supplementary Table 2).** (A) Schematic overview of the mammalian mitochondrial Complex I composed of 4 functional modules and 44 subunits, inspired by the review of Giachin *et al.* 2016 (Giachin G. *Front Mol Biosci* 2016, 3:43). The 24 Complex I-subunits genes that were found enriched in the high OXPHOS compared to low OXPHOS PDAC patients are represented in black font. (B) Kaplan-Meier survival curve for high and low OXPHOS patient groups (n=7 and n=14, respectively). p value was calculated by the log-rank (Mantel-Cox) statistic test. (C) Kaplan-Meier survival curves using transcriptomic analysis on patient-derived xenografts, divided into high and low NDUFB8 subunit expression (cutpoint 13.22) for PDAC patients with resectable tumors (left; n = 39) and biopsy patients only (right; n = 36). p values from the log-rank statistic test.

**A**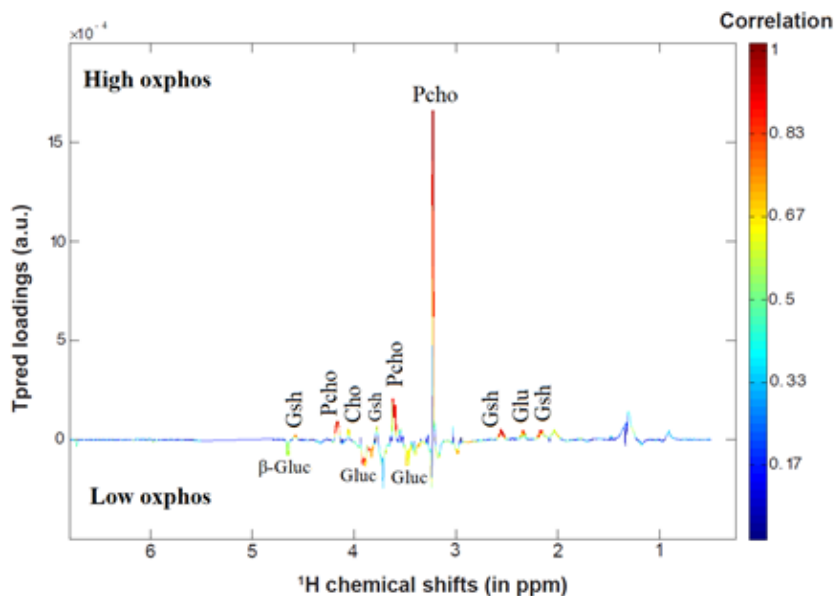**B**

| Metabolites    | $^1\text{H}$ chemical shift (in ppm), multiplicity and assignment                                       | High oxphos/<br>Low oxphos <sup>a</sup> | P-value |
|----------------|---------------------------------------------------------------------------------------------------------|-----------------------------------------|---------|
| Choline        | 3.21 (s) CH <sub>3</sub> , 4.05 (m) CH <sub>2</sub>                                                     | 1.97                                    | <0.001  |
| Phosphocholine | 3.22 (s) CH <sub>3</sub> , 3.59 (m) CH <sub>2</sub> , 4.16 (m) CH <sub>2</sub>                          | 5.31                                    | <0.001  |
| Glucose        | 4.64 (d) CH, 3.90, 3.83, 3.47, 3.40 unresolved signals                                                  | 0.52                                    | <0.001  |
| Glutamate      | 2.34 (m) $\gamma$ CH <sub>2</sub> , 2.04 (m) $\beta$ CH <sub>2</sub> , 2.11 (m) $\beta$ CH <sub>2</sub> | 1.63                                    | <0.001  |
| Glutathione    | 4.58 (m) CH, 3.77 (m) CH, 2.56 (m) CH <sub>2</sub> , 2.17 (m) CH <sub>2</sub>                           | 2.68                                    | <0.001  |
| Unknown        | 2.98, 1.66, 1.44 broad                                                                                  | 0.55                                    | <0.001  |

s = singlet; d = doublet; m = multiplet

### Supplementary Figure 6. High OXPHOS PDAC cells show metabolic specificities compared to low OXPHOS (related to Figure 3E).

(A) Representative profile of metabolic analysis by HRMAS-NMR of primary cells from 3 High OXPHOS PDAC patients versus 3 low OXPHOS. OPLS-DA predictive component loading plot showing the weights of each NMR variable in the discrimination in High OXPHOS (Top part) versus Low OXPHOS (Bottom part). The NMR variables are color-coded according to their correlation coefficients with the predictive component. Significantly discriminant metabolites were annotated on the loading plot. Abbreviations : Cho = choline, Glu = glutamate, Gluc = Glucose, Gsh = Glutathione, Pcho = Phosphocholine. (B) Metabolites that contributed significantly to the discrimination between the High OXPHOS and Low OXPHOS in the OPLS-DA model from the  $^1\text{H}$  NMR data.

<sup>a</sup>Fold change in metabolite level followed by P-value (t-test).

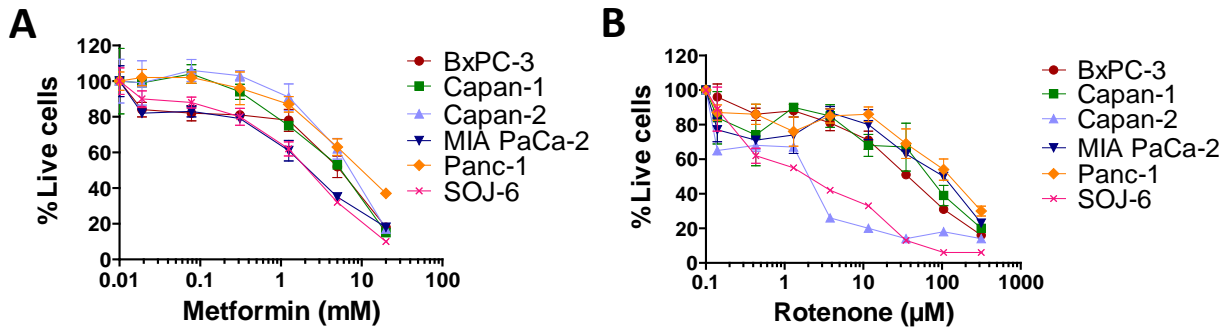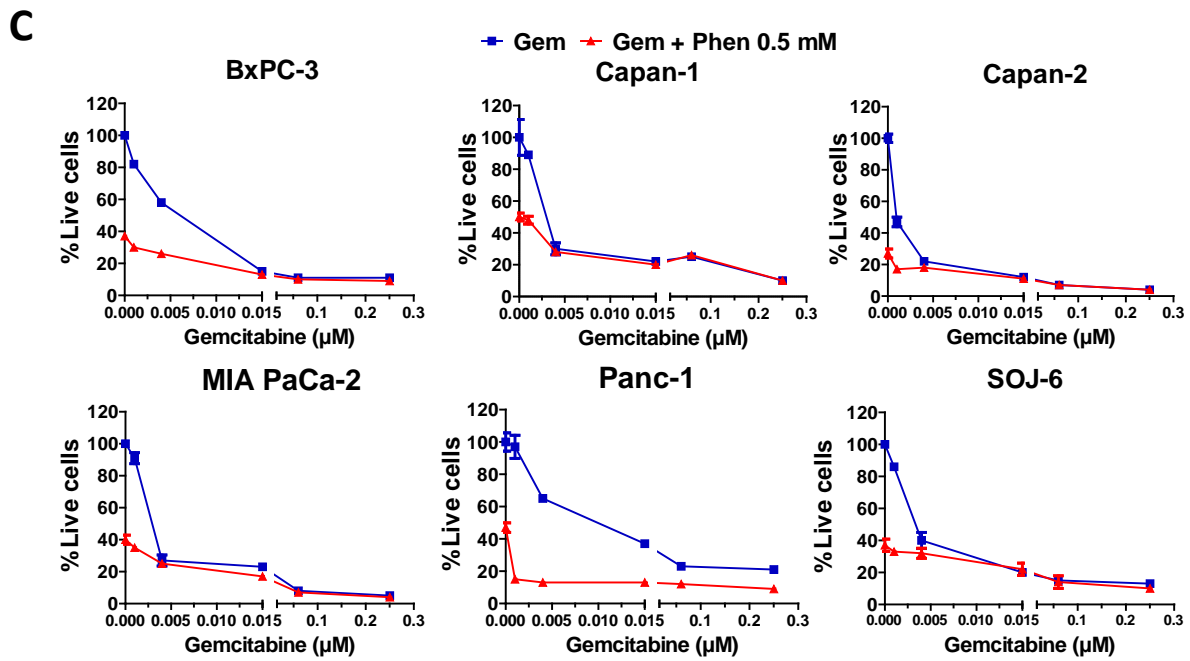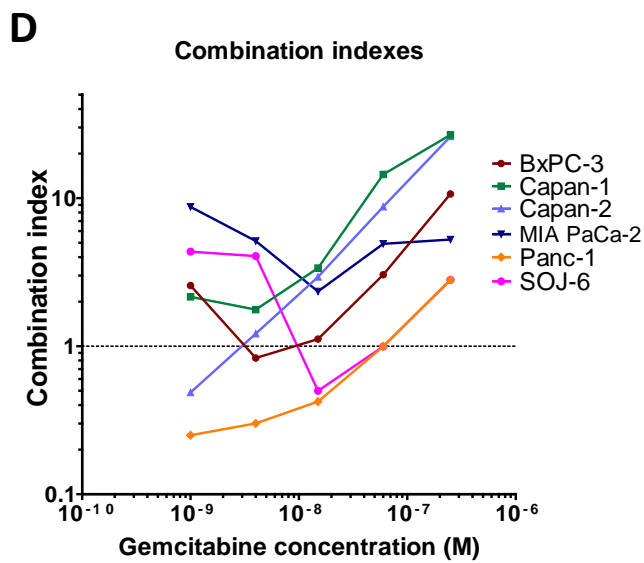

**Supplementary Figure 7. Classical PDAC cells are sensitive to drugs targeting mitochondrial respiratory Complex I, and Phenformin synergizes with Gemcitabine in high OXPHOS PDAC cells (related to Figure 4A - C).** (A-B) Dose-response curves to treatment of the six classical PDAC cell lines with Metformin and Rotenone, respectively. Live cells are indicated as a % of the control (vehicle treated). Data are means of triplicates  $\pm$  SEM. (C) Representative dose-response curves for the six PDAC cell lines treated with different concentrations of Gemcitabine alone (blue curves) and Gemcitabine in combination with 0.5 mM Phenformin (red curves) for 72h. Cell viability is indicated as a % of the control (vehicle treated). Data are means of triplicates  $\pm$  SEM. (D) Combination indexes (CI) for Phenformin 0.5 mM treatment with Gemcitabine at different concentrations, according to the Chou and Talalay method: additive effects ( $0.8 \leq CI \leq 1.2$ ), synergism ( $CI < 0.8$ ) and antagonism ( $CI > 1.2$ ) in drug combinations.

**A**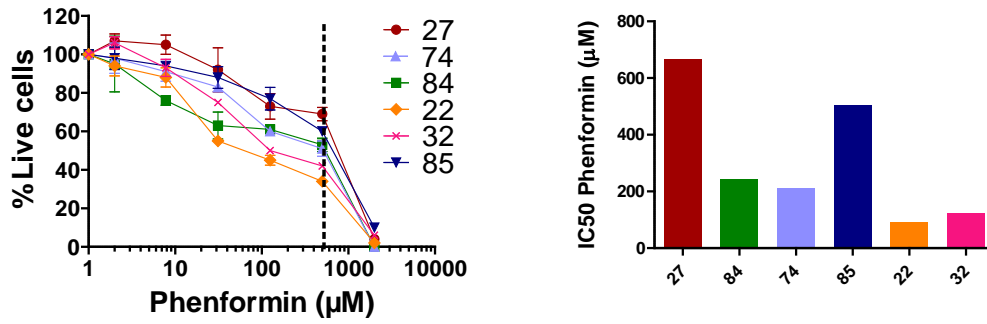**B**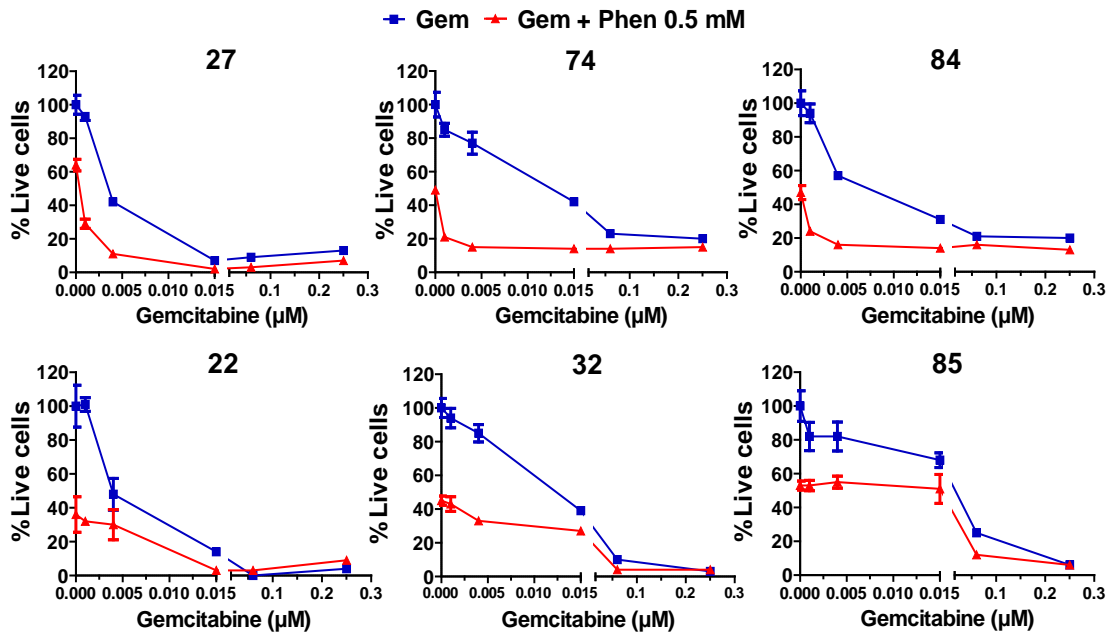**C**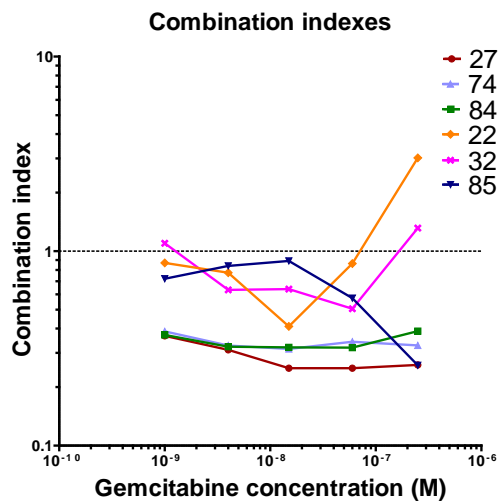



**Supplementary Figure 8. Phenformin treatment synergizes with Gemcitabine in high OXPHOS primary PDAC cells (related to Figure 4D).** (A) Dose-response curve to Phenformin treatment (left) of six primary PDAC cells: 3 high OXPHOS patients (27, 74, and 84) and 3 low OXPHOS (22, 32, and 85). Live cells are indicated as a % of the control (vehicle treated). Data are means of triplicates  $\pm$  SEM. The IC50 values of Phenformin (Right) were calculated from the dose-response curve. (B) Representative dose-response curves of the six primary PDAC cells treated with different concentrations of Gemcitabine alone (blue curves) and Gemcitabine in combination with 0.5 mM Phenformin (red curves) for 72h. Cell viability is indicated as a % of the control (vehicle treated). Data are means of triplicates  $\pm$  SEM. (C) Combination indexes (CI) for Phenformin 0.5 mM treatment with Gemcitabine at different concentrations, according to the Chou and Talalay method. Combination treatment specifically sensitizes high OXPHOS cells (27, 74, and 84) to Gemcitabine, with combination indexes lower than 0.5 that means strong synergy.

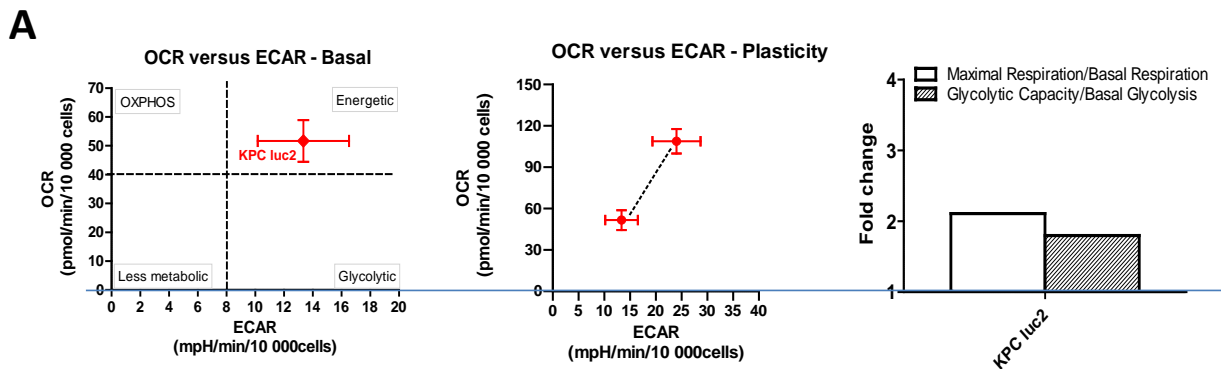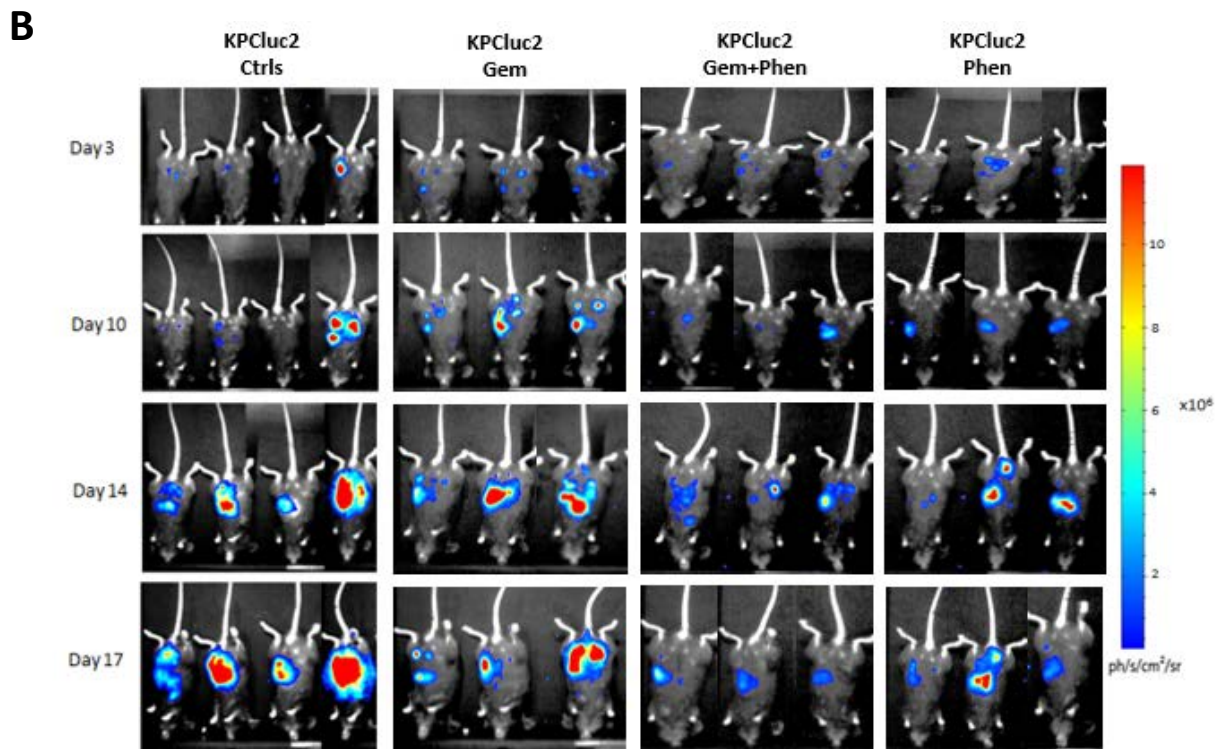

**Supplementary Figure 9. Phenformin enhances Gemcitabine antitumoral activity in high OXPHOS murine PDAC cells (related to Figure 6D and E).** (A) Seahorse data. Left: basal OCR versus basal ECAR plot. Middle and Right: two different representations of cell metabolic plasticity, as described in the legend of Supplementary Figure 1E-F. The data are representative of 6 independent experiments (B) Representative *in vivo* bioluminescence imaging data at different times after orthotopic implantation of KPC luc2 cells.

**Supplementary Table 1 (related to Figure 1 and S9A).** Cell density and FCCP concentration used in Seahorse experiments, and KRAS and p53 genetic status for each PDAC cell line: 6 classical human cell lines, 21 from patients of the PaCaOmics cohort for which the name was anonymized, and the murine KPC luc2 cell line. The genetic information for the PaCaOmics patients is available in Nicolle R. *et al.*, 2017. NA = not available. All PaCaOmics tumors are KRAS mutated except one (PDAC012T) and all PaCaOmics tumors for which the p53 status was investigated (12 over 21) are mutated or lost except one (PDAC032T).

| <b>Cell line</b>  | <b>Cellular density</b> | <b>[FCCP] <math>\mu</math>M</b> | <b>KRAS status</b> | <b>p53 mutated/loss</b> |
|-------------------|-------------------------|---------------------------------|--------------------|-------------------------|
| <b>BxPC-3</b>     | 40 000                  | 0.25                            | WT                 | Mut                     |
| <b>Capan-1</b>    | 40 000                  | 0.5                             | Mut                | Mut                     |
| <b>Capan-2</b>    | 40 000                  | 0.25                            | Mut                | WT                      |
| <b>MIA PaCa-2</b> | 40 000                  | 0.125                           | Mut                | Mut                     |
| <b>Panc-1</b>     | 40 000                  | 0.5                             | Mut                | Mut                     |
| <b>SOJ-6</b>      | 40 000                  | 0.25                            | Unknown            | Unknown                 |
| <b>PDAC001T</b>   | 30 000                  | 0.5                             | G12D (homo)        | Mut                     |
| <b>PDAC003T</b>   | 30 000                  | 0.5                             | G12D (hetero)      | Mut/loss                |
| <b>PDAC012T</b>   | 50 000                  | 0.5                             | 12-13 WT           | Mut/loss                |
| <b>PDAC014T</b>   | 40 000                  | 0.5                             | G12V (hetero)      | Mut/loss                |
| <b>PDAC015T</b>   | 20 000                  | 1                               | G12D (hetero)      | Mut/loss                |
| <b>PDAC018T</b>   | 15 000                  | 1                               | G12D (hetero)      | Mut/loss                |
| <b>PDAC021T</b>   | 30 000                  | 0.5                             | G12V (hetero)      | Mut/loss                |
| <b>PDAC022T</b>   | 40 000                  | 1                               | G12R (hetero)      | Mut/loss                |
| <b>PDAC024T</b>   | 30 000                  | 0.5                             | G12D (homo)        | Mut/loss                |
| <b>PDAC027T</b>   | 20 000                  | 0.5                             | G12V (hetero)      | Mut/loss                |
| <b>PDAC028T</b>   | 40 000                  | 0.5                             | G12V (homo)        | Mut/loss                |
| <b>PDAC032T</b>   | 40 000                  | 1                               | G12D (hetero)      | WT                      |
| <b>PDAC074T</b>   | 20 000                  | 0.25                            | G12D (hetero)      | NA                      |
| <b>PDAC079T</b>   | 30 000                  | 0.5                             | G12D (homo)        | NA                      |
| <b>PDAC081T</b>   | 40 000                  | 0.5                             | G12D (hetero)      | NA                      |
| <b>PDAC082T</b>   | 30 000                  | 1                               | G12V (hetero)      | NA                      |
| <b>PDAC084T</b>   | 20 000                  | 0.5                             | G12V (hetero)      | NA                      |
| <b>PDAC085T</b>   | 40 000                  | 0.5                             | G12V (hetero)      | NA                      |
| <b>PDAC087T</b>   | 30 000                  | 0.5                             | G12D (hetero)      | NA                      |
| <b>PDAC088T</b>   | 40 000                  | 0.5                             | G12V (hetero)      | NA                      |
| <b>PDAC089T</b>   | 50 000                  | 1                               | G12D (hetero)      | NA                      |
| <b>KPC luc2</b>   | 30 000                  | 1                               | G12D (hetero)      | Mut                     |

**Supplementary Table 2 (related to Figure 3B and Supplementary Figure 5A).** Pathways enriched in the high OXPHOS PDAC patients (PDAC027T, PDAC074T, PDAC084T) compared to low OXPHOS PDAC patients (PDAC022T, PDAC032T, PDAC085T).

| <b>Reactome Pathways</b>                                         | <b>Proteins</b>                                                                                                                                                                                                                                                                                                                                                                                        | <b>FDR</b> |
|------------------------------------------------------------------|--------------------------------------------------------------------------------------------------------------------------------------------------------------------------------------------------------------------------------------------------------------------------------------------------------------------------------------------------------------------------------------------------------|------------|
| Mitochondrial translation initiation_Homo sapiens_R-HSA-5368286  | MRPL12, MRPS26, MRPL40, MRPL46, ICT1, MRPS34, MRPL38, MRPL43, MRPS7, GADD45GIP1, MRPL11, MRPL42, MRPS11, MRPS23, MRPL20, MRPL16, MRPL51, MRPS5, MRPS15, MRPS33, CHCHD1, AURKAIP1, MRPL27, MRPL17, MRPS16, PTC3, MRPL10, MTFMT, MRPL34, MRPS25, MTIF2, MRPS28, MRPS24, MRPL54, MRPL37, MRPL39, MRPL9, MRPL52, MRPL36, MRPL53, MRPS9, MRPL18, MRPS12, MRPL28, MRPL23, MRPL21, MRPL35                     | 0.02851    |
| Mitochondrial translation_Homo sapiens_R-HSA-5368287             | MRPL12, MRPS26, MRPL40, MRPL46, ICT1, MRPS34, MRPL38, MRPL43, MRPS7, GADD45GIP1, MRPL11, MRPL42, MRPS11, MRPS23, MRPL20, MRPL16, MRPL51, MRPS5, MRPS15, MRPS33, CHCHD1, AURKAIP1, TSFM, MRPL27, MRPL17, MRPS16, PTC3, MRPL10, MTFMT, MRPL34, MRPS25, MTIF2, MTRF1L, MRPS28, MRPS24, MRPL54, TUFM, MRPL37, MRPL39, MRPL9, MRPL52, MRPL36, MRPL53, MRPS9, MRPL18, MRPS12, MRPL28, MRPL23, MRPL21, MRPL35 | 0.02851    |
| Mitochondrial translation termination_Homo sapiens_R-HSA-5419276 | MRPL12, MRPS26, MRPL40, MRPL46, ICT1, MRPS34, MRPL38, MRPL43, MRPS7, GADD45GIP1, MRPL11, MRPL42, MRPS11, MRPS23, MRPL20, MRPL16, MRPL51, MRPS5, MRPS15, MRPS33, CHCHD1, AURKAIP1, MRPL27, MRPL17, MRPS16, PTC3, MRPL10, MRPL34, MRPS25, MTRF1L, MRPS28, MRPS24, MRPL54, MRPL37, MRPL39, MRPL9, MRPL52, MRPL36, MRPL53, MRPS9, MRPL18, MRPS12, MRPL28, MRPL23, MRPL21, MRPL35                           | 0.02851    |
| Mitochondrial translation elongation_Homo sapiens_R-HSA-5389840  | MRPL12, MRPS26, MRPL40, MRPL46, ICT1, MRPS34, MRPL38, MRPL43, MRPS7, GADD45GIP1, MRPL11, MRPL42, MRPS11, MRPS23, MRPL20, MRPL16, MRPL51, MRPS5, MRPS15, MRPS33, CHCHD1, AURKAIP1, TSFM, MRPL27, MRPL17, MRPS16, PTC3, MRPL10, MRPL34, MRPS25, MRPS28, MRPS24, MRPL54, TUFM, MRPL37, MRPL39, MRPL9, MRPL52, MRPL36, MRPL53, MRPS9, MRPL18, MRPS12, MRPL28, MRPL23, MRPL21, MRPL35                       | 0.02851    |
| Respiratory electron transport, ATP synthesis by                 | UCP1, SLC25A27, NDUFA12, ATP5I, COX6A1, NDUFB9, UQC10, ECSIT, ATP5G2, NDUFAF3, COX5A, COX14, NDUFV2, SCO2, ATP5H, NDUFB8,                                                                                                                                                                                                                                                                              | 0.02851    |

|                                                                                              |                                                                                                                                                                                                                                                                                                                                                                                                                                               |                |
|----------------------------------------------------------------------------------------------|-----------------------------------------------------------------------------------------------------------------------------------------------------------------------------------------------------------------------------------------------------------------------------------------------------------------------------------------------------------------------------------------------------------------------------------------------|----------------|
| chemiosmotic coupling, and heat production by uncoupling proteins._Homo sapiens_R-HSA-163200 | NDUFS5, NDUFA7, TACO1, NDUFAF5, NDUFA9, NDUFAB1, ATP5D, NDUFA13, ATP5E, NDUFS3, NDUFAF1, COX6B1, COX4I1, NUBPL, NDUFB10, NDUFC2, COX7A2L, COX16, NDUFA11, ATP5G3, UQCR11, ATP5C1, NDUFB7, TIMMDC1, UCP2, NDUFB6, UQCRH, ETFA, NDUFC1, COX11, COX5B, NDUFS8, NDUFAF7, UQCRC1, COX8A, COX6C, NDUFA10, ETFDH, COX18, UQCRB, ATP5J, NDUFA1                                                                                                        |                |
| Complex I biogenesis_Homo sapiens_R-HSA-6799198                                              | NDUFA12, NDUFB9, ECSIT, NDUFAF3, NDUFV2, NDUFB8, NDUFS5, NDUFA7, NDUFAF5, NDUFA9, NDUFAB1, NDUFA13, NDUFS3, NDUFAF1, NUBPL, NDUFB10, NDUFC2, NDUFA11, NDUFB7, TIMMDC1, NDUFB6, NDUFC1, NDUFS8, NDUFAF7, NDUFA10                                                                                                                                                                                                                               | 0.04947        |
| <b>GO Biological Process Term</b>                                                            | <b>Proteins</b>                                                                                                                                                                                                                                                                                                                                                                                                                               | <b>FDR</b>     |
| mitochondrial translational elongation (GO:0070125)                                          | MRPL12, MRPS26, MRPL40, MRPL46, MRPS34, MRPL38, MRPL43, MRPS7, GADD45GIP1, LARS2, MRPL11, MRPL42, MRPS11, MRPS23, NDUFA7, MRPL20, MRPL16, MRPL51, ERAL1, MRPS5, MRPS15, GATC, MRPS33, CHCHD1, PTRH1, AURKAIP1, TSFM, MRPL27, MRPL17, MRPS16, PTC3, EEF1B2, MRPL10, NOA1, MRPL34, MRPS25, EEF2K, MRPS28, MRPS24, MRPL54, TUFM, MRPL37, MRPL39, MRPL9, MRPL52, MRPL36, MRPL53, MRPS9, MRPL18, MRPS12, MRPS2, MRPL28, MRPL23, MRPL21, MRPL35     | 0.02243        |
| mitochondrial translational termination (GO:0070126)                                         | MRPL12, MRPS26, MRPL40, MRPL46, MRPS34, MRPL38, MRPL43, MRPS7, GADD45GIP1, LARS2, MRPL11, MRPL42, MRPS11, MRPS23, NDUFA7, MRPL20, MRPL16, MRPL51, ERAL1, MRPS5, MRPS15, GATC, MRPS33, CHCHD1, PTRH1, AURKAIP1, MRPL27, MRPL17, TRMT112, MRPS16, PTC3, MRPL10, NOA1, MRPL34, MRPS25, N6AMT1, MTRF1L, MRPS28, MRPS24, MRPL54, MRPL37, APEH, MRPL39, MRPL9, MRPL52, MRPL36, MRPL53, MRPS9, MRPL18, MRPS12, MRPS2, MRPL28, MRPL23, MRPL21, MRPL35 | 0.02718        |
| <b>GO Cell</b>                                                                               | <b>Proteins</b>                                                                                                                                                                                                                                                                                                                                                                                                                               | <b>P value</b> |
| mitochondrial respiratory chain complex I, membrane segment (GO:0042653)                     | NDUFA12, NDUFB9, NDUFV2, NDUFB8, NDUFS5, NDUFA7, SNCA, MT-ND2, NDUFA9, NDUFAB1, NDUFA13, NDUFS3, NDUFAF1, NDUFB10, MT-ND1, MT-ND5, NDUFC2, NDUFA11, NDUFB7, NDUFB6, NDUFC1, NDUFS8, NDUFA10, MT-ND3, NDUFA1, PARK7, FOXRED1                                                                                                                                                                                                                   | 0.00739        |

|                                                                                       |                                                                                                                                                                                                                                       |                |
|---------------------------------------------------------------------------------------|---------------------------------------------------------------------------------------------------------------------------------------------------------------------------------------------------------------------------------------|----------------|
| <p>mitochondrial respiratory chain complex I, peripheral segment<br/>(GO:0042652)</p> | <p>NDUFA12, NDUFB9, NDUFV2, NDUFB8, NDUFS5, NDUFA7, SNCA, MT-ND2, NDUFA9, NDUFAB1, NDUFA13, NDUFS3, NDUFAB1, NDUFB10, MT-ND1, MT-ND5, NDUFC2, NDUFA11, NDUFB7, NDUFB6, NDUFC1, NDUFS8, NDUFA10, MT-ND3, NDUFA1, PARK7, FOXRED1</p>    | <p>0.00739</p> |
| <p>mitochondrial respiratory chain complex I<br/>(GO:0005747)</p>                     | <p>NDUFA12, NDUFB9, NDUFV2, NDUFB8, NDUFS5, NDUFA7, SNCA, MT-ND2, NDUFA9, NDUFAB1, NDUFA13, NDUFS3, NDUFAB1, NDUFB10, MT-ND1, MT-ND5, NDUFC2, NDUFA11, NDUFB7, NDUFB6, NDUFC1, NDUFS8, NDUFA10, MT-ND3, NDUFA1, PARK7, FOXRED1</p>    | <p>0.00739</p> |
| <p>mitochondrial large ribosomal subunit<br/>(GO:0005762)</p>                         | <p>MRPL12, MRPL40, MRPL46, MRPL38, MRPL43, MRPL11, MRPL42, MPV17L2, MRPL20, MRPL16, MRPL51, MRPL27, MRPL17, MRPL10, MRPL34, MRPL54, MRPL37, MRPL39, MRPL9, MRPL52, MRPL36, MRPL53, MRPL18, MRPL28, MRPL23, MRPL21, MRPL35, MRPL48</p> | <p>0.00747</p> |
